# Supplementary material for: A High-Throughput Clinical Laboratory Methodology for the Therapeutic Monitoring of Ibrutinib and Dihydrodiol Ibrutinib
Source: MDPI journal article supplement (doi:10.3390/molecules27154766), 2022-07-25

Individual Noncompartmental Analysis Result

subj=1

NONCOMPARTMENTAL ANALYSIS REPORT  
Package version 0.4.5 (2022-02-23)  
R version 4.0.5 (2021-03-31)

Date and Time: 2022-04-01 22:04:24 Europe/Prague

Calculation Setting

-----  
Drug Administration: Extravascular  
Observation count excluding trailing zero: 7  
Dose at time 0: 0.953 mmol  
AUC Calculation Method: Linear-up Linear-down  
Weighting for lambda z: Uniform (Ordinary Least Square, OLS)  
Lambda z selection criterion: Heighest adjusted R-squared value with precision=1e-4

Fitting, AUC, AUMC Result

| Time      | Conc.    | Pred.    | Residual   | AUC       | AUMC      |
|-----------|----------|----------|------------|-----------|-----------|
| 0.0000 +  | 0.0000   |          |            | 0.0000    | 0.0000    |
| 0.0100    | 8.2000   |          |            | 0.0410    | 0.0004    |
| 0.5000    | 68.4000  |          |            | 18.8080   | 8.3995    |
| 1.0000    | 250.9000 |          |            | 98.6330   | 79.6745   |
| 2.0000    | 265.6000 |          |            | 356.8830  | 470.7245  |
| 4.0000 *  | 101.7000 | 101.6711 | +2.889e-02 | 724.1830  | 1408.7245 |
| 23.0000 * | 9.2000   | 9.2524   | -5.243e-02 | 1777.7330 | 7283.5245 |
| 24.0000 * | 8.2000   | 8.1559   | +4.415e-02 | 1786.4330 | 7487.7245 |

+: Back extrapolated concentration  
\*: Used for the calculation of Lambda z.

Calculated Values

|         |                                         |                         |
|---------|-----------------------------------------|-------------------------|
| CMAX    | Max Conc                                | 265.6000 nmol/L         |
| CMAXD   | Max Conc Norm by Dose                   | 278.6988 nmol/L/mmol    |
| TMAX    | Time of CMAX                            | 2.0000 h                |
| TLAG    | Time Until First Nonzero Conc           | 0.0000 h                |
| CLST    | Last Nonzero Conc                       | 8.2000 nmol/L           |
| CLSTP   | Last Nonzero Conc Pred                  | 8.1559 nmol/L           |
| TLST    | Time of Last Nonzero Conc               | 24.0000 h               |
| LAMZHL  | Half-Life Lambda z                      | 5.4946 h                |
| LAMZ    | Lambda z                                | 0.1262 /h               |
| LAMZLL  | Lambda z Lower Limit                    | 4.0000 h                |
| LAMZUL  | Lambda z Upper Limit                    | 24.0000 h               |
| LAMZNPT | Number of Points for Lambda z           | 3                       |
| CORRXY  | Correlation Between TimeX and Log ConcY | -1.0000                 |
| R2      | R Squared                               | 1.0000                  |
| R2ADJ   | R Squared Adjusted                      | 1.0000                  |
| AUCLST  | AUC to Last Nonzero Conc                | 1786.4330 h*nmol/L      |
| AUCALL  | AUC All                                 | 1786.4330 h*nmol/L      |
| AUCIFO  | AUC Infinity Obs                        | 1851.4348 h*nmol/L      |
| AUCIFOD | AUC Infinity Obs Norm by Dose           | 1942.7437 h*nmol/L/mmol |

subj=1

|          |                                    |                         |
|----------|------------------------------------|-------------------------|
| AUCIFP   | AUC Infinity Pred                  | 1851.0848 h*nmol/L      |
| AUCIFPD  | AUC Infinity Pred Norm by Dose     | 1942.3765 h*nmol/L/mmol |
| AUCPEO   | AUC %Extrapolation Obs             | 3.5109 %                |
| AUCPEP   | AUC %Extrapolation Pred            | 3.4926 %                |
| AUMCLST  | AUMC to Last Nonzero Conc          | 7487.7245 h2*nmol/L     |
| AUMCIFO  | AUMC Infinity Obs                  | 9563.0397 h2*nmol/L     |
| AUMCIFP  | AUMC Infinity Pred                 | 9551.8664 h2*nmol/L     |
| AUMCPEO  | AUMC %Extrapolation Obs            | 21.7014 %               |
| AUMCPEP  | AUMC % Extrapolation Pred          | 21.6098 %               |
| VZFO     | Vz Obs by F                        | 4080.3361 L             |
| VZFP     | Vz Pred by F                       | 4081.1075 L             |
| CLFO     | Total CL Obs by F                  | 514.7359 L/h            |
| CLFP     | Total CL Pred by F                 | 514.8332 L/h            |
| MRTEVLST | MRT Extravasc to Last Nonzero Conc | 4.1914 h                |
| MRTEVIFO | MRT Extravasc Infinity Obs         | 5.1652 h                |
| MRTEVIFP | MRT Extravasc Infinity Pred        | 5.1601 h                |

subj=1

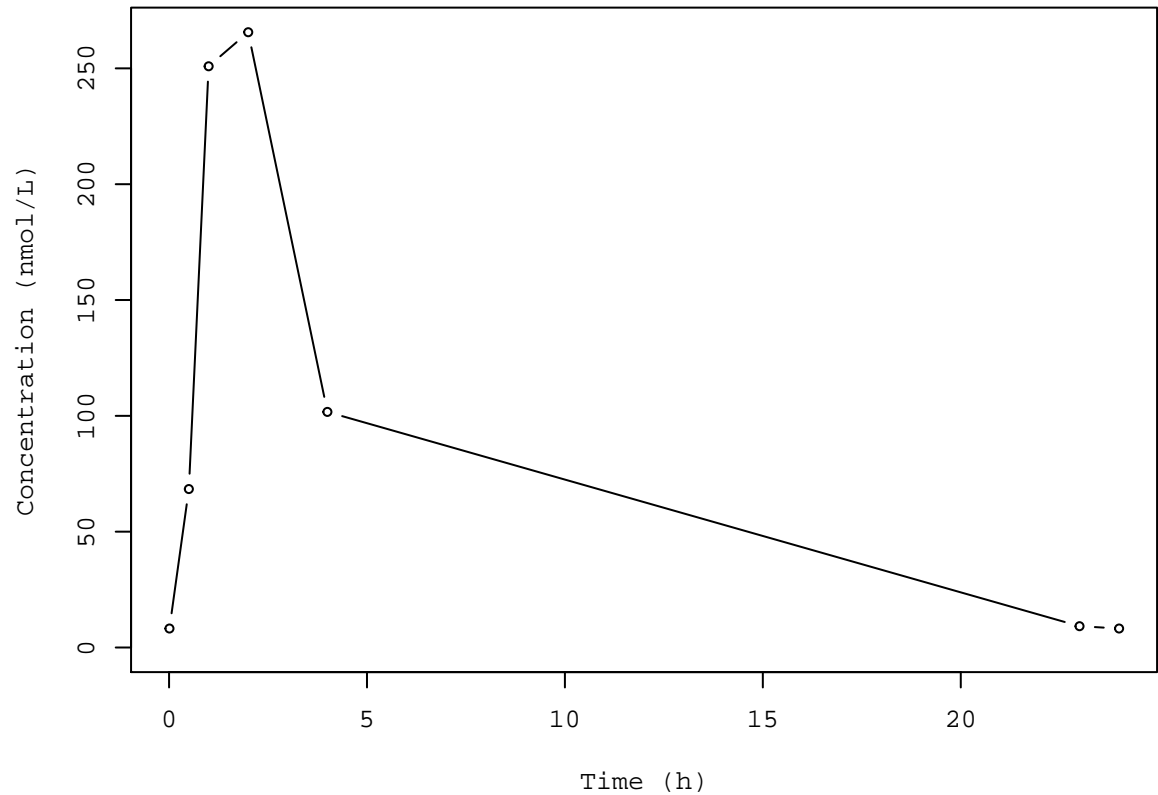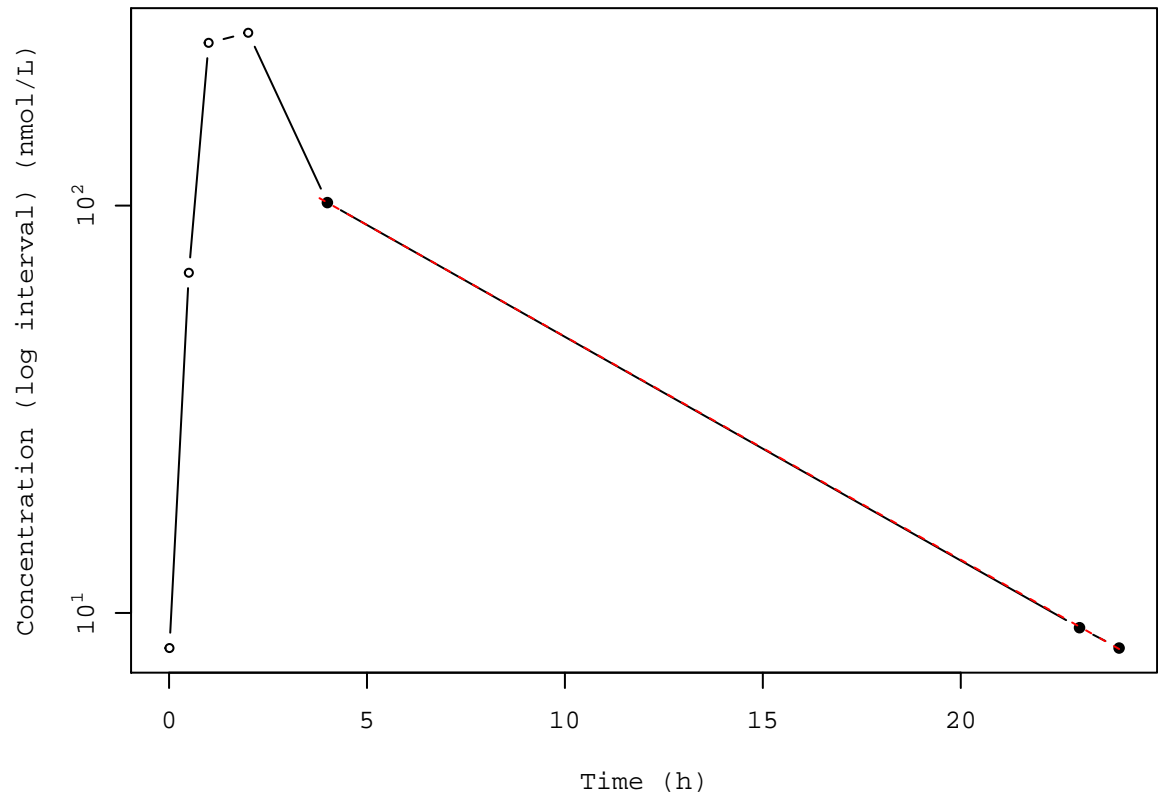

Individual Noncompartmental Analysis Result

subj=1

NONCOMPARTMENTAL ANALYSIS REPORT  
Package version 0.4.5 (2022-02-23)  
R version 4.0.5 (2021-03-31)

Date and Time: 2022-07-12 22:39:35 Europe/Prague

Calculation Setting

-----  
Drug Administration: Extravascular  
Observation count excluding trailing zero: 7  
Dose at time 0: 0 mmol  
AUC Calculation Method: Linear-up Linear-down  
Weighting for lambda z: Uniform (Ordinary Least Square, OLS)  
Lambda z selection criterion: Heighest adjusted R-squared value with precision=1e-4

Fitting, AUC, AUMC Result

| Time      | Conc.    | Pred.    | Residual   | AUC       | AUMC       |
|-----------|----------|----------|------------|-----------|------------|
| 0.0000 +  | 0.0000   |          |            | 0.0000    | 0.0000     |
| 0.0100    | 34.6322  |          |            | 0.1732    | 0.0017     |
| 0.5000    | 53.3565  |          |            | 21.7304   | 6.6228     |
| 1.0000    | 139.0137 |          |            | 69.8230   | 48.0457    |
| 2.0000    | 184.7313 |          |            | 231.6955  | 302.2839   |
| 4.0000 *  | 142.9294 | 143.3264 | -3.970e-01 | 559.3562  | 1243.4641  |
| 23.0000 * | 41.3200  | 39.0901  | +2.230e+00 | 2309.7253 | 15703.1982 |
| 24.0000 * | 34.6322  | 36.5064  | -1.874e+00 | 2347.7014 | 16593.9650 |

+: Back extrapolated concentration  
\*: Used for the calculation of Lambda z.

Calculated Values

|         |                                         |                    |
|---------|-----------------------------------------|--------------------|
| CMAX    | Max Conc                                | 184.7313 nmol/L    |
| TMAX    | Time of CMAX                            | 2.0000 h           |
| TLAG    | Time Until First Nonzero Conc           | 0.0000 h           |
| CLST    | Last Nonzero Conc                       | 34.6322 nmol/L     |
| CLSTP   | Last Nonzero Conc Pred                  | 36.5064 nmol/L     |
| TLST    | Time of Last Nonzero Conc               | 24.0000 h          |
| LAMZHL  | Half-Life Lambda z                      | 10.1364 h          |
| LAMZ    | Lambda z                                | 0.0684 /h          |
| LAMZLL  | Lambda z Lower Limit                    | 4.0000 h           |
| LAMZUL  | Lambda z Upper Limit                    | 24.0000 h          |
| LAMZNPT | Number of Points for Lambda z           | 3                  |
| CORRXY  | Correlation Between TimeX and Log ConcY | -0.9975            |
| R2      | R Squared                               | 0.9951             |
| R2ADJ   | R Squared Adjusted                      | 0.9902             |
| AUCLST  | AUC to Last Nonzero Conc                | 2347.7014 h*nmol/L |
| AUCALL  | AUC All                                 | 2347.7014 h*nmol/L |
| AUCIFO  | AUC Infinity Obs                        | 2854.1553 h*nmol/L |
| AUCIFP  | AUC Infinity Pred                       | 2881.5627 h*nmol/L |
| AUCPEO  | AUC %Extrapolation Obs                  | 17.7444 %          |

subj=1

|          |                                    |                      |
|----------|------------------------------------|----------------------|
| AUCPEP   | AUC %Extrapolation Pred            | 18.5268 %            |
| AUMCLST  | AUMC to Last Nonzero Conc          | 16593.9650 h2*nmol/L |
| AUMCIFO  | AUMC Infinity Obs                  | 36155.1204 h2*nmol/L |
| AUMCIFP  | AUMC Infinity Pred                 | 37213.6967 h2*nmol/L |
| AUMCPEO  | AUMC %Extrapolation Obs            | 54.1034 %            |
| AUMCPEP  | AUMC % Extrapolation Pred          | 55.4090 %            |
| VZFO     | Vz Obs by F                        | 0.0000 L             |
| VZFP     | Vz Pred by F                       | 0.0000 L             |
| CLFO     | Total CL Obs by F                  | 0.0000 L/h           |
| CLFP     | Total CL Pred by F                 | 0.0000 L/h           |
| MRTEVLST | MRT Extravasc to Last Nonzero Conc | 7.0682 h             |
| MRTEVIFO | MRT Extravasc Infinity Obs         | 12.6675 h            |
| MRTEVIFP | MRT Extravasc Infinity Pred        | 12.9144 h            |

subj=1

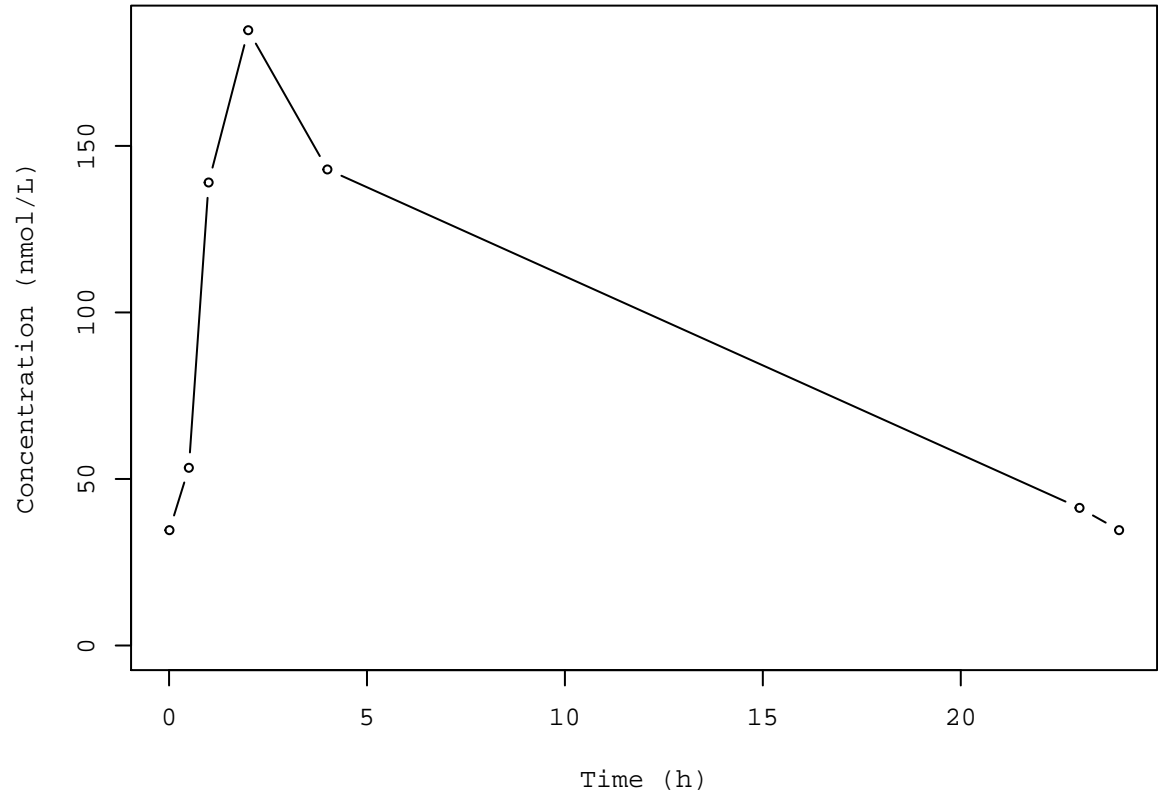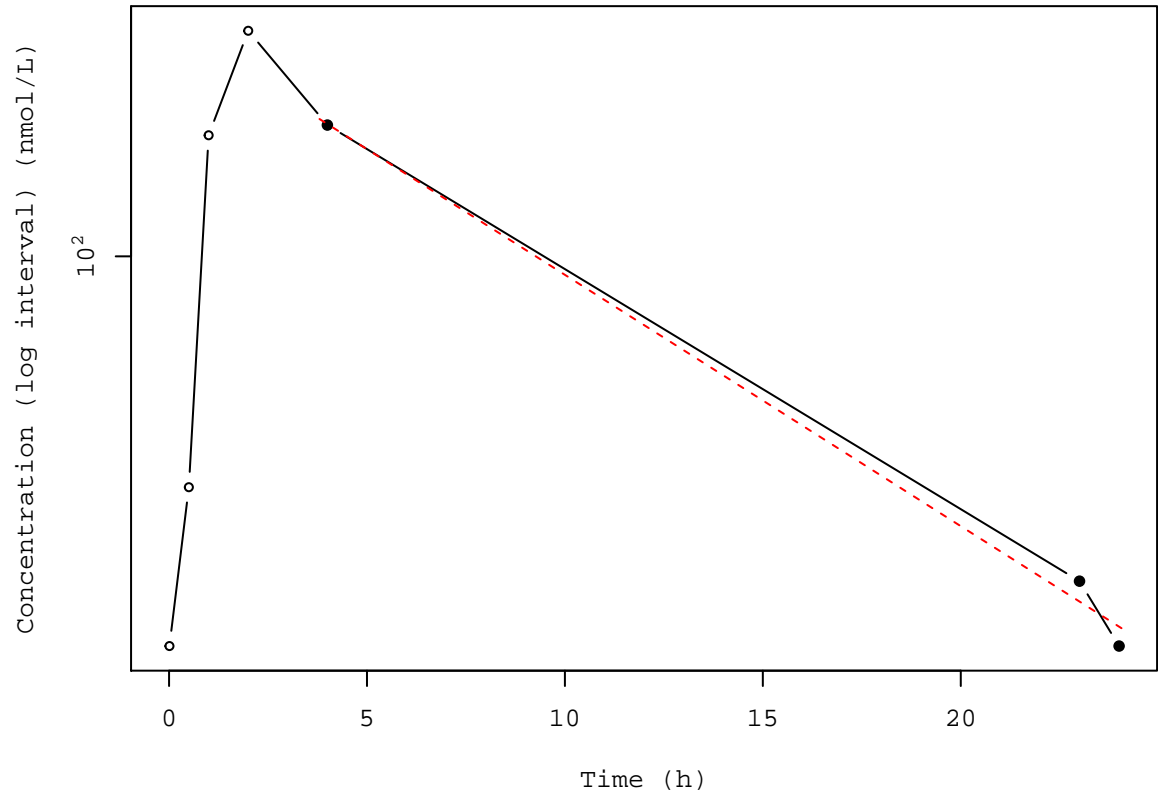



Individual Noncompartmental Analysis Result

subj=1

NONCOMPARTMENTAL ANALYSIS REPORT  
Package version 0.4.5 (2022-02-23)  
R version 4.0.5 (2021-03-31)

Date and Time: 2022-04-01 22:09:18 Europe/Prague

Calculation Setting

-----  
Drug Administration: Extravascular  
Observation count excluding trailing zero: 7  
Dose at time 0: 0.953 mmol  
AUC Calculation Method: Linear-up Linear-down  
Weighting for lambda z: Uniform (Ordinary Least Square, OLS)  
Lambda z selection criterion: Heighest adjusted R-squared value with precision=1e-4

Fitting, AUC, AUMC Result

| Time      | Conc.    | Pred.    | Residual   | AUC       | AUMC       |
|-----------|----------|----------|------------|-----------|------------|
| 0.0000 +  | 0.0000   |          |            | 0.0000    | 0.0000     |
| 0.0100    | 42.8322  |          |            | 0.2142    | 0.0021     |
| 0.5000    | 121.7565 |          |            | 40.5384   | 15.0223    |
| 1.0000    | 389.9137 |          |            | 168.4560  | 127.7202   |
| 2.0000    | 450.3313 |          |            | 588.5785  | 773.0084   |
| 4.0000 *  | 244.6294 | 245.1304 | -5.010e-01 | 1283.5392 | 2652.1886  |
| 23.0000 * | 50.5200  | 48.4944  | +2.026e+00 | 4087.4583 | 22986.7227 |
| 24.0000 * | 42.8322  | 44.5301  | -1.698e+00 | 4134.1344 | 24081.6895 |

+: Back extrapolated concentration  
\*: Used for the calculation of Lambda z.

Calculated Values

|         |                                         |                         |
|---------|-----------------------------------------|-------------------------|
| CMAX    | Max Conc                                | 450.3313 nmol/L         |
| CMAXD   | Max Conc Norm by Dose                   | 472.5407 nmol/L/mmol    |
| TMAX    | Time of CMAX                            | 2.0000 h                |
| TLAG    | Time Until First Nonzero Conc           | 0.0000 h                |
| CLST    | Last Nonzero Conc                       | 42.8322 nmol/L          |
| CLSTP   | Last Nonzero Conc Pred                  | 44.5301 nmol/L          |
| TLST    | Time of Last Nonzero Conc               | 24.0000 h               |
| LAMZHL  | Half-Life Lambda z                      | 8.1278 h                |
| LAMZ    | Lambda z                                | 0.0853 /h               |
| LAMZLL  | Lambda z Lower Limit                    | 4.0000 h                |
| LAMZUL  | Lambda z Upper Limit                    | 24.0000 h               |
| LAMZNPT | Number of Points for Lambda z           | 3                       |
| CORRXY  | Correlation Between TimeX and Log ConcY | -0.9991                 |
| R2      | R Squared                               | 0.9983                  |
| R2ADJ   | R Squared Adjusted                      | 0.9966                  |
| AUCLST  | AUC to Last Nonzero Conc                | 4134.1344 h*nmol/L      |
| AUCALL  | AUC All                                 | 4134.1344 h*nmol/L      |
| AUCIFO  | AUC Infinity Obs                        | 4636.3816 h*nmol/L      |
| AUCIFOD | AUC Infinity Obs Norm by Dose           | 4865.0384 h*nmol/L/mmol |

subj=1

|          |                                    |                         |
|----------|------------------------------------|-------------------------|
| AUCIFP   | AUC Infinity Pred                  | 4656.2911 h*nmol/L      |
| AUCIFPD  | AUC Infinity Pred Norm by Dose     | 4885.9298 h*nmol/L/mmol |
| AUCPEO   | AUC %Extrapolation Obs             | 10.8327 %               |
| AUCPEP   | AUC %Extrapolation Pred            | 11.2140 %               |
| AUMCLST  | AUMC to Last Nonzero Conc          | 24081.6895 h2*nmol/L    |
| AUMCIFO  | AUMC Infinity Obs                  | 42024.9298 h2*nmol/L    |
| AUMCIFP  | AUMC Infinity Pred                 | 42736.2144 h2*nmol/L    |
| AUMCPEO  | AUMC %Extrapolation Obs            | 42.6967 %               |
| AUMCPEP  | AUMC % Extrapolation Pred          | 43.6504 %               |
| VZFO     | Vz Obs by F                        | 2410.2407 L             |
| VZFP     | Vz Pred by F                       | 2399.9350 L             |
| CLFO     | Total CL Obs by F                  | 205.5482 L/h            |
| CLFP     | Total CL Pred by F                 | 204.6693 L/h            |
| MRTEVLST | MRT Extravasc to Last Nonzero Conc | 5.8251 h                |
| MRTEVIFO | MRT Extravasc Infinity Obs         | 9.0642 h                |
| MRTEVIFP | MRT Extravasc Infinity Pred        | 9.1782 h                |

subj=1

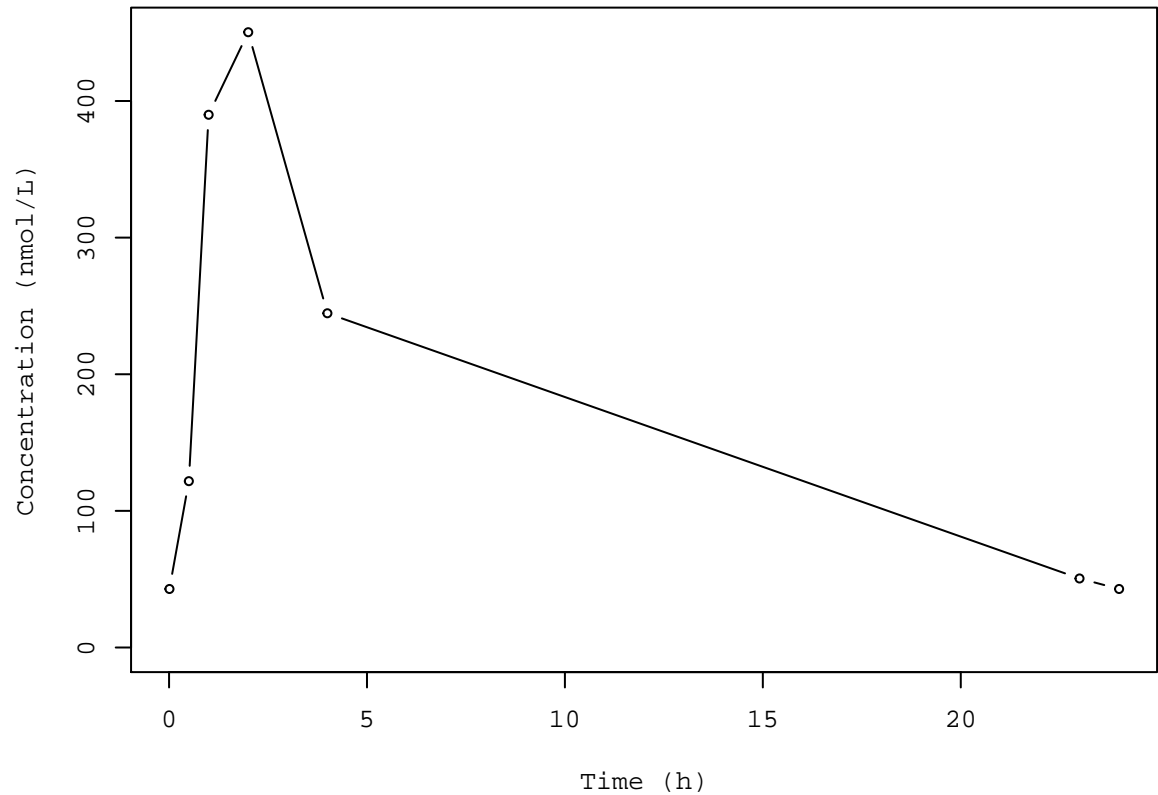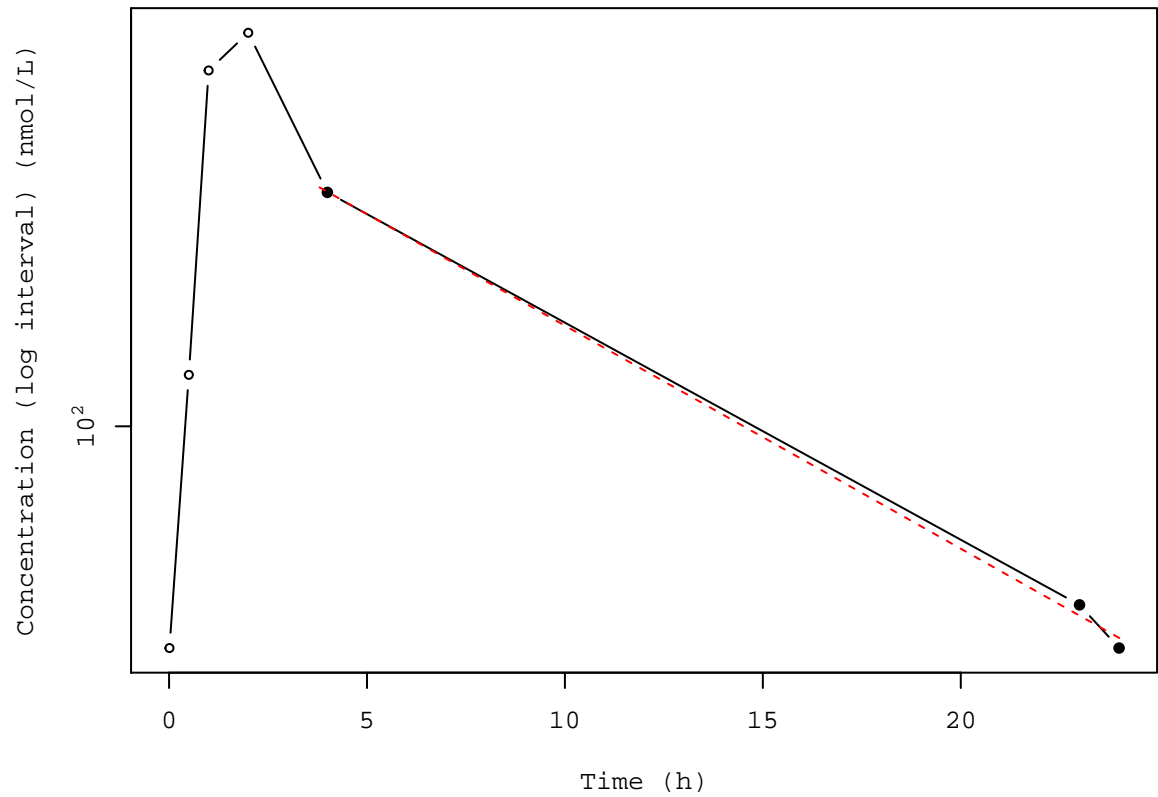

Individual Noncompartmental Analysis Result

subj=2

NONCOMPARTMENTAL ANALYSIS REPORT  
Package version 0.4.5 (2022-02-23)  
R version 4.0.5 (2021-03-31)

Date and Time: 2022-04-02 23:29:02 Europe/Prague

Calculation Setting

-----  
Drug Administration: Extravascular  
Observation count excluding trailing zero: 7  
Dose at time 0: 0.953 mmol  
AUC Calculation Method: Linear-up Linear-down  
Weighting for lambda z: Uniform (Ordinary Least Square, OLS)  
Lambda z selection criterion: Heighest adjusted R-squared value with precision=1e-4

Fitting, AUC, AUMC Result

| Time      | Conc.    | Pred.   | Residual   | AUC       | AUMC      |
|-----------|----------|---------|------------|-----------|-----------|
| 0.0000 +  | 0.0000   |         |            | 0.0000    | 0.0000    |
| 0.0100    | 9.3000   |         |            | 0.0465    | 0.0005    |
| 0.5000    | 173.3000 |         |            | 44.7835   | 21.2525   |
| 1.0000    | 374.0000 |         |            | 181.6085  | 136.4150  |
| 2.0000    | 191.5000 |         |            | 464.3585  | 514.9150  |
| 4.0000 *  | 92.2000  | 92.3507 | -1.507e-01 | 748.0585  | 1266.7150 |
| 23.0000 * | 11.1000  | 10.7432 | +3.568e-01 | 1729.4085 | 7195.6650 |
| 24.0000 * | 9.3000   | 9.5932  | -2.932e-01 | 1739.6085 | 7434.9150 |

+: Back extrapolated concentration  
\*: Used for the calculation of Lambda z.

Calculated Values

|         |                                         |                         |
|---------|-----------------------------------------|-------------------------|
| CMAX    | Max Conc                                | 374.0000 nmol/L         |
| CMAXD   | Max Conc Norm by Dose                   | 392.4449 nmol/L/mmol    |
| TMAX    | Time of CMAX                            | 1.0000 h                |
| TLAG    | Time Until First Nonzero Conc           | 0.0000 h                |
| CLST    | Last Nonzero Conc                       | 9.3000 nmol/L           |
| CLSTP   | Last Nonzero Conc Pred                  | 9.5932 nmol/L           |
| TLST    | Time of Last Nonzero Conc               | 24.0000 h               |
| LAMZHL  | Half-Life Lambda z                      | 6.1217 h                |
| LAMZ    | Lambda z                                | 0.1132 /h               |
| LAMZLL  | Lambda z Lower Limit                    | 4.0000 h                |
| LAMZUL  | Lambda z Upper Limit                    | 24.0000 h               |
| LAMZNPT | Number of Points for Lambda z           | 3                       |
| CORRXY  | Correlation Between TimeX and Log ConcY | -0.9997                 |
| R2      | R Squared                               | 0.9994                  |
| R2ADJ   | R Squared Adjusted                      | 0.9988                  |
| AUCLST  | AUC to Last Nonzero Conc                | 1739.6085 h*nmol/L      |
| AUCALL  | AUC All                                 | 1739.6085 h*nmol/L      |
| AUCIFO  | AUC Infinity Obs                        | 1821.7442 h*nmol/L      |
| AUCIFOD | AUC Infinity Obs Norm by Dose           | 1911.5889 h*nmol/L/mmol |

subj=2

|          |                                    |                         |
|----------|------------------------------------|-------------------------|
| AUCIFP   | AUC Infinity Pred                  | 1824.3333 h*nmol/L      |
| AUCIFPD  | AUC Infinity Pred Norm by Dose     | 1914.3057 h*nmol/L/mmol |
| AUCPEO   | AUC %Extrapolation Obs             | 4.5086 %                |
| AUCPEP   | AUC %Extrapolation Pred            | 4.6442 %                |
| AUMCLST  | AUMC to Last Nonzero Conc          | 7434.9150 h2*nmol/L     |
| AUMCIFO  | AUMC Infinity Obs                  | 10131.5791 h2*nmol/L    |
| AUMCIFP  | AUMC Infinity Pred                 | 10216.5824 h2*nmol/L    |
| AUMCPEO  | AUMC %Extrapolation Obs            | 26.6164 %               |
| AUMCPEP  | AUMC % Extrapolation Pred          | 27.2270 %               |
| VZFO     | Vz Obs by F                        | 4620.1354 L             |
| VZFP     | Vz Pred by F                       | 4613.5786 L             |
| CLFO     | Total CL Obs by F                  | 523.1250 L/h            |
| CLFP     | Total CL Pred by F                 | 522.3826 L/h            |
| MRTEVLST | MRT Extravasc to Last Nonzero Conc | 4.2739 h                |
| MRTEVIFO | MRT Extravasc Infinity Obs         | 5.5615 h                |
| MRTEVIFP | MRT Extravasc Infinity Pred        | 5.6002 h                |

subj=2

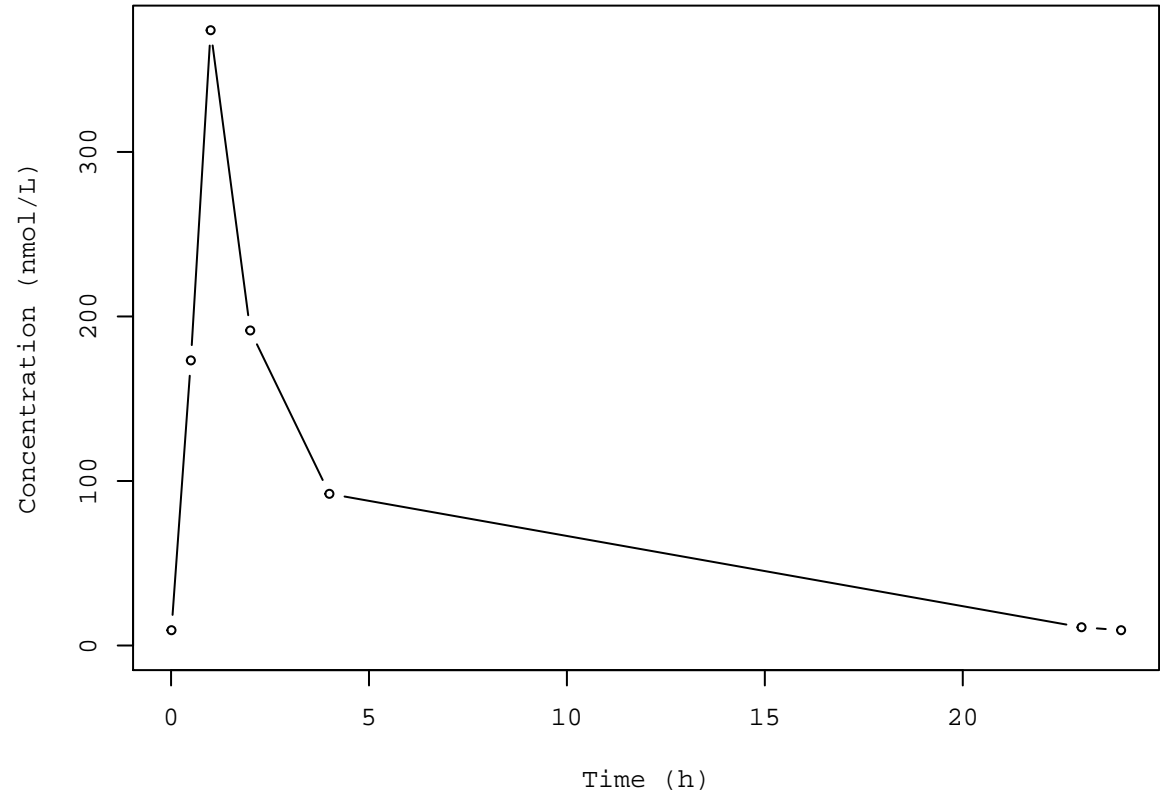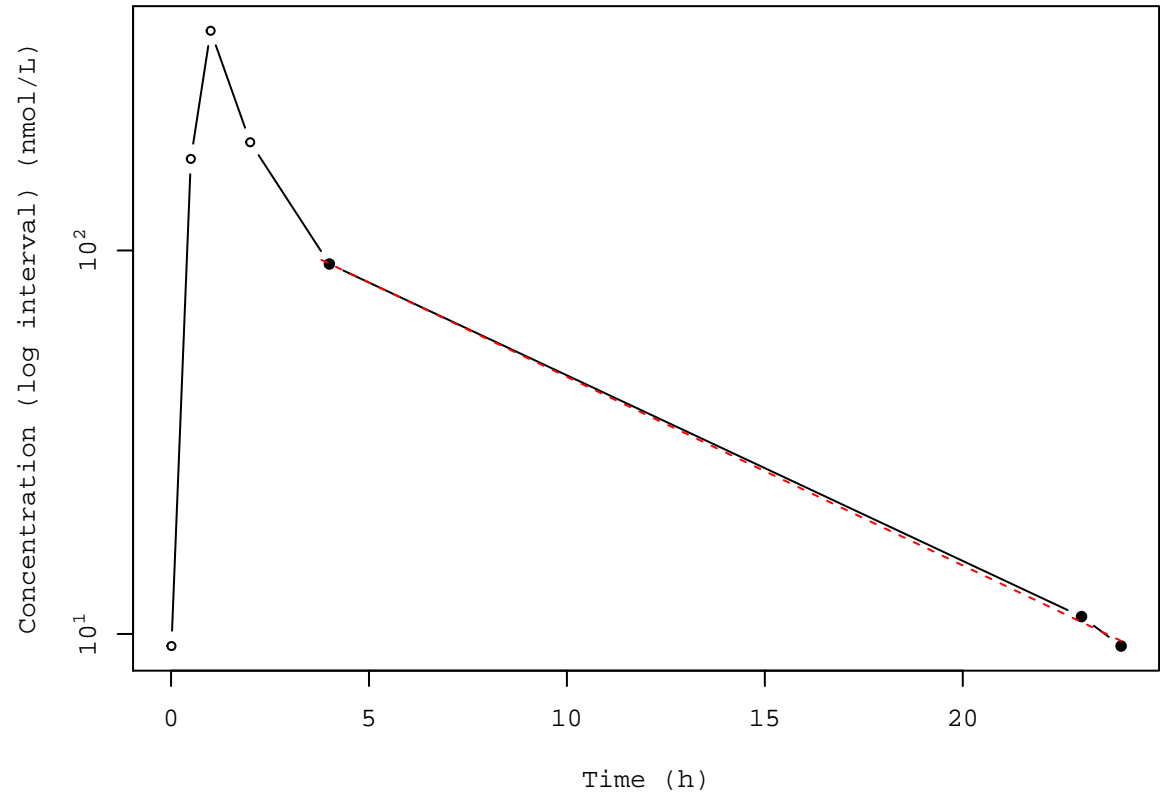



Individual Noncompartmental Analysis Result

subj=2

NONCOMPARTMENTAL ANALYSIS REPORT  
Package version 0.4.5 (2022-02-23)  
R version 4.0.5 (2021-03-31)

Date and Time: 2022-07-12 22:39:07 Europe/Prague

Calculation Setting

-----  
Drug Administration: Extravascular  
Observation count excluding trailing zero: 7  
Dose at time 0: 0 mmol  
AUC Calculation Method: Linear-up Linear-down  
Weighting for lambda z: Uniform (Ordinary Least Square, OLS)  
Lambda z selection criterion: Heighest adjusted R-squared value with precision=1e-4

Fitting, AUC, AUMC Result

| Time      | Conc.    | Pred.    | Residual   | AUC       | AUMC       |
|-----------|----------|----------|------------|-----------|------------|
| 0.0000 +  | 0.0000   |          |            | 0.0000    | 0.0000     |
| 0.0100    | 13.1907  |          |            | 0.0660    | 0.0007     |
| 0.5000    | 71.5033  |          |            | 20.8160   | 8.7921     |
| 1.0000    | 253.7014 |          |            | 102.1172  | 81.1554    |
| 2.0000 *  | 227.1106 | 224.9858 | +2.125e+00 | 342.5232  | 435.1168   |
| 4.0000 *  | 171.9543 | 173.6181 | -1.664e+00 | 741.5882  | 1577.1554  |
| 23.0000 * | 14.5915  | 14.8004  | -2.089e-01 | 2513.7737 | 11299.6630 |
| 24.0000 * | 13.1907  | 13.0015  | +1.892e-01 | 2527.6648 | 11625.7539 |

+: Back extrapolated concentration  
\*: Used for the calculation of Lambda z.

Calculated Values

|         |                                         |                    |
|---------|-----------------------------------------|--------------------|
| CMAX    | Max Conc                                | 253.7014 nmol/L    |
| TMAX    | Time of CMAX                            | 1.0000 h           |
| TLAG    | Time Until First Nonzero Conc           | 0.0000 h           |
| CLST    | Last Nonzero Conc                       | 13.1907 nmol/L     |
| CLSTP   | Last Nonzero Conc Pred                  | 13.0015 nmol/L     |
| TLST    | Time of Last Nonzero Conc               | 24.0000 h          |
| LAMZHL  | Half-Life Lambda z                      | 5.3488 h           |
| LAMZ    | Lambda z                                | 0.1296 /h          |
| LAMZLL  | Lambda z Lower Limit                    | 2.0000 h           |
| LAMZUL  | Lambda z Upper Limit                    | 24.0000 h          |
| LAMZNPT | Number of Points for Lambda z           | 4                  |
| CORRXY  | Correlation Between TimeX and Log ConcY | -1.0000            |
| R2      | R Squared                               | 0.9999             |
| R2ADJ   | R Squared Adjusted                      | 0.9999             |
| AUCLST  | AUC to Last Nonzero Conc                | 2527.6648 h*nmol/L |
| AUCALL  | AUC All                                 | 2527.6648 h*nmol/L |
| AUCIFO  | AUC Infinity Obs                        | 2629.4533 h*nmol/L |
| AUCIFP  | AUC Infinity Pred                       | 2627.9934 h*nmol/L |
| AUCPEO  | AUC %Extrapolation Obs                  | 3.8711 %           |

subj=2

|          |                                    |                      |
|----------|------------------------------------|----------------------|
| AUCPEP   | AUC %Extrapolation Pred            | 3.8177 %             |
| AUMCLST  | AUMC to Last Nonzero Conc          | 11625.7539 h2*nmol/L |
| AUMCIFO  | AUMC Infinity Obs                  | 14854.1469 h2*nmol/L |
| AUMCIFP  | AUMC Infinity Pred                 | 14807.8422 h2*nmol/L |
| AUMCPEO  | AUMC %Extrapolation Obs            | 21.7340 %            |
| AUMCPEP  | AUMC % Extrapolation Pred          | 21.4892 %            |
| VZFO     | Vz Obs by F                        | 0.0000 L             |
| VZFP     | Vz Pred by F                       | 0.0000 L             |
| CLFO     | Total CL Obs by F                  | 0.0000 L/h           |
| CLFP     | Total CL Pred by F                 | 0.0000 L/h           |
| MRTEVLST | MRT Extravasc to Last Nonzero Conc | 4.5994 h             |
| MRTEVIFO | MRT Extravasc Infinity Obs         | 5.6491 h             |
| MRTEVIFP | MRT Extravasc Infinity Pred        | 5.6347 h             |

subj=2

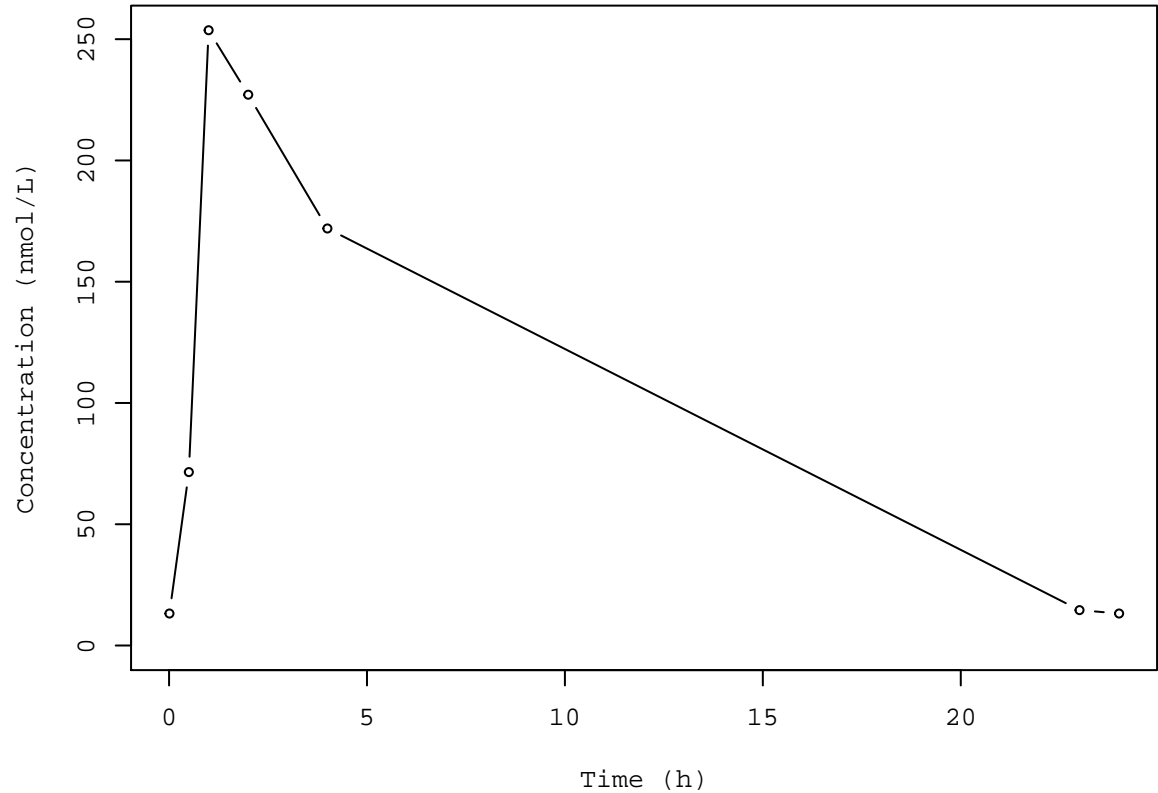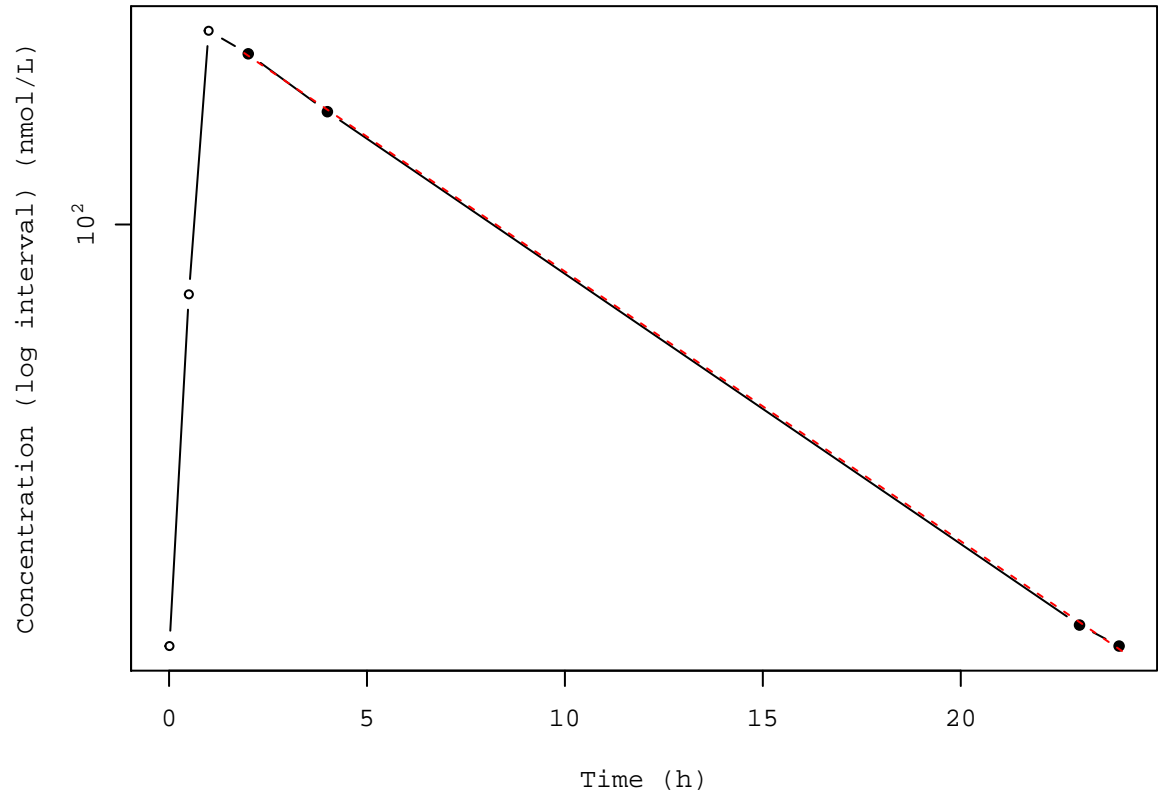

Individual Noncompartmental Analysis Result

subj=2

NONCOMPARTMENTAL ANALYSIS REPORT  
Package version 0.4.5 (2022-02-23)  
R version 4.0.5 (2021-03-31)

Date and Time: 2022-04-02 23:30:33 Europe/Prague

Calculation Setting

-----  
Drug Administration: Extravascular  
Observation count excluding trailing zero: 7  
Dose at time 0: 0.953 mmol  
AUC Calculation Method: Linear-up Linear-down  
Weighting for lambda z: Uniform (Ordinary Least Square, OLS)  
Lambda z selection criterion: Heighest adjusted R-squared value with precision=1e-4

Fitting, AUC, AUMC Result

| Time      | Conc.    | Pred.    | Residual   | AUC       | AUMC       |
|-----------|----------|----------|------------|-----------|------------|
| 0.0000 +  | 0.0000   |          |            | 0.0000    | 0.0000     |
| 0.0100    | 22.5407  |          |            | 0.1127    | 0.0011     |
| 0.5000    | 244.8533 |          |            | 65.6242   | 30.0509    |
| 1.0000    | 627.6727 |          |            | 283.7557  | 217.5757   |
| 2.0000    | 418.5968 |          |            | 806.8905  | 950.0089   |
| 4.0000 *  | 264.1571 | 264.2219 | -6.481e-02 | 1489.6445 | 2843.8311  |
| 23.0000 * | 25.7319  | 25.6059  | +1.259e-01 | 4243.5900 | 18504.2161 |
| 24.0000 * | 22.5407  | 22.6460  | -1.053e-01 | 4267.7263 | 19070.6211 |

+: Back extrapolated concentration  
\*: Used for the calculation of Lambda z.

Calculated Values

|         |                                         |                         |
|---------|-----------------------------------------|-------------------------|
| CMAX    | Max Conc                                | 627.6727 nmol/L         |
| CMAXD   | Max Conc Norm by Dose                   | 658.6282 nmol/L/mmol    |
| TMAX    | Time of CMAX                            | 1.0000 h                |
| TLAG    | Time Until First Nonzero Conc           | 0.0000 h                |
| CLST    | Last Nonzero Conc                       | 22.5407 nmol/L          |
| CLSTP   | Last Nonzero Conc Pred                  | 22.6460 nmol/L          |
| TLST    | Time of Last Nonzero Conc               | 24.0000 h               |
| LAMZHL  | Half-Life Lambda z                      | 5.6427 h                |
| LAMZ    | Lambda z                                | 0.1228 /h               |
| LAMZLL  | Lambda z Lower Limit                    | 4.0000 h                |
| LAMZUL  | Lambda z Upper Limit                    | 24.0000 h               |
| LAMZNPT | Number of Points for Lambda z           | 3                       |
| CORRXY  | Correlation Between TimeX and Log ConcY | -1.0000                 |
| R2      | R Squared                               | 1.0000                  |
| R2ADJ   | R Squared Adjusted                      | 1.0000                  |
| AUCLST  | AUC to Last Nonzero Conc                | 4267.7263 h*nmol/L      |
| AUCALL  | AUC All                                 | 4267.7263 h*nmol/L      |
| AUCIFO  | AUC Infinity Obs                        | 4451.2224 h*nmol/L      |
| AUCIFOD | AUC Infinity Obs Norm by Dose           | 4670.7475 h*nmol/L/mmol |

subj=2

|          |                                    |                         |
|----------|------------------------------------|-------------------------|
| AUCIFP   | AUC Infinity Pred                  | 4452.0797 h*nmol/L      |
| AUCIFPD  | AUC Infinity Pred Norm by Dose     | 4671.6471 h*nmol/L/mmol |
| AUCPEO   | AUC %Extrapolation Obs             | 4.1224 %                |
| AUCPEP   | AUC %Extrapolation Pred            | 4.1408 %                |
| AUMCLST  | AUMC to Last Nonzero Conc          | 19070.6211 h2*nmol/L    |
| AUMCIFO  | AUMC Infinity Obs                  | 24968.3043 h2*nmol/L    |
| AUMCIFP  | AUMC Infinity Pred                 | 24995.8570 h2*nmol/L    |
| AUMCPEO  | AUMC %Extrapolation Obs            | 23.6207 %               |
| AUMCPEP  | AUMC % Extrapolation Pred          | 23.7049 %               |
| VZFO     | Vz Obs by F                        | 1742.9013 L             |
| VZFP     | Vz Pred by F                       | 1742.5657 L             |
| CLFO     | Total CL Obs by F                  | 214.0985 L/h            |
| CLFP     | Total CL Pred by F                 | 214.0573 L/h            |
| MRTEVLST | MRT Extravasc to Last Nonzero Conc | 4.4686 h                |
| MRTEVIFO | MRT Extravasc Infinity Obs         | 5.6093 h                |
| MRTEVIFP | MRT Extravasc Infinity Pred        | 5.6144 h                |

subj=2

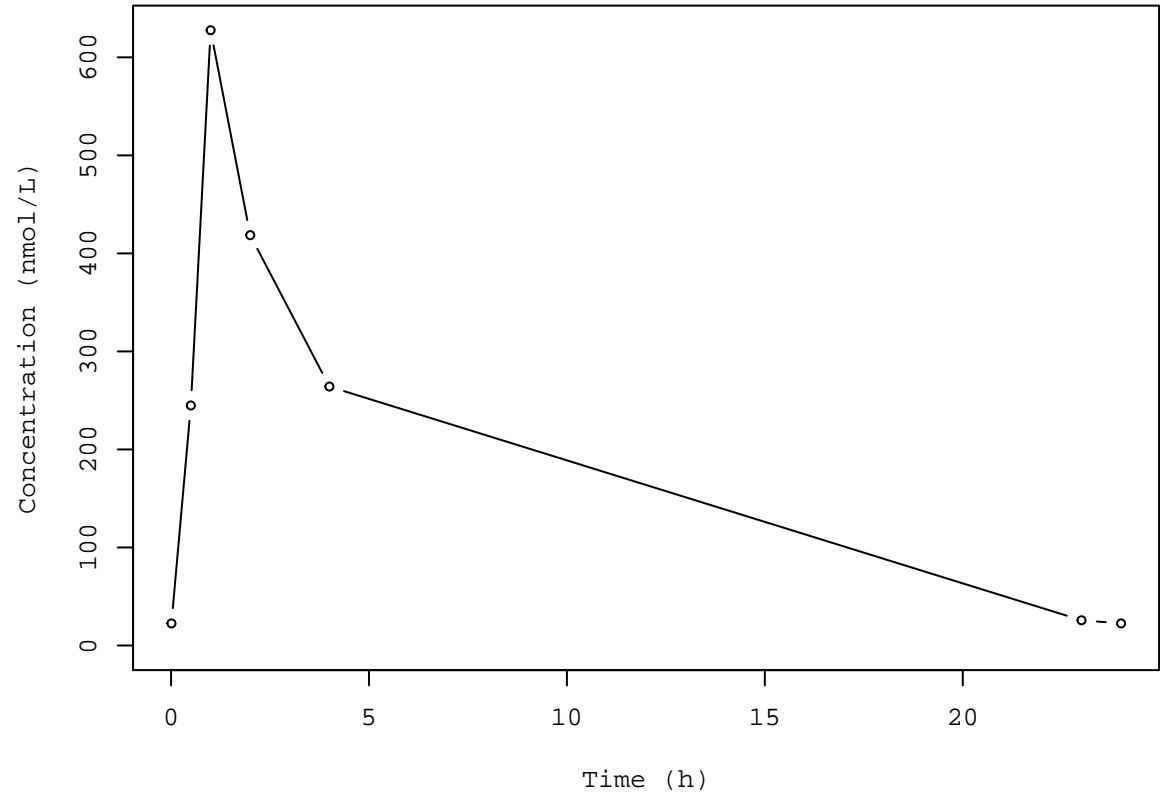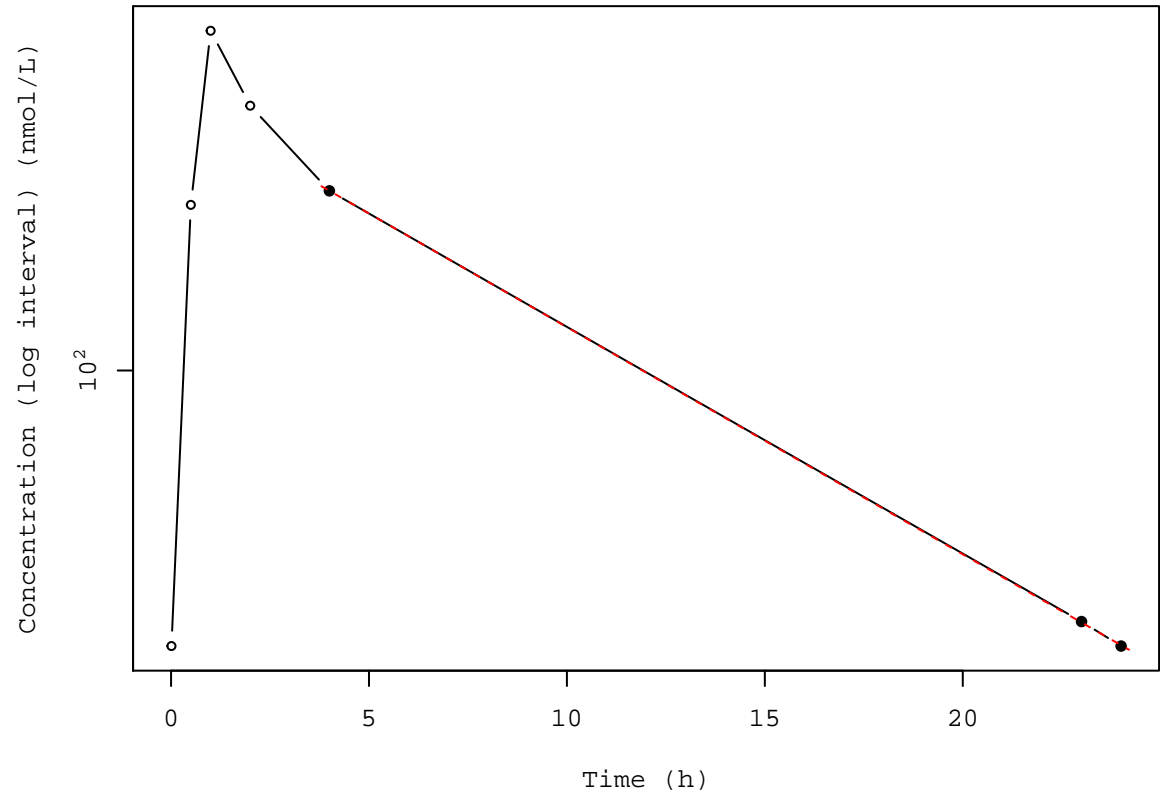



Individual Noncompartmental Analysis Result

subj=3

NONCOMPARTMENTAL ANALYSIS REPORT  
Package version 0.4.5 (2022-02-23)  
R version 4.0.5 (2021-03-31)

Date and Time: 2022-07-12 23:15:03 Europe/Prague

Calculation Setting

-----  
Drug Administration: Extravascular  
Observation count excluding trailing zero: 7  
Dose at time 0: 0 mmol  
AUC Calculation Method: Linear-up Linear-down  
Weighting for lambda z: Uniform (Ordinary Least Square, OLS)  
Lambda z selection criterion: Heighest adjusted R-squared value with precision=1e-4

Fitting, AUC, AUMC Result

| Time      | Conc.    | Pred.   | Residual   | AUC      | AUMC      |
|-----------|----------|---------|------------|----------|-----------|
| 0.0000 +  | 0.0000   |         |            | 0.0000   | 0.0000    |
| 0.0100    | 2.1000   |         |            | 0.0105   | 0.0001    |
| 0.5000    | 61.7000  |         |            | 15.6415  | 7.5635    |
| 1.0000    | 163.2000 |         |            | 71.8665  | 56.0760   |
| 2.0000    | 128.2000 |         |            | 217.5665 | 265.8760  |
| 4.0000 *  | 23.2000  | 23.1823 | +1.774e-02 | 368.9665 | 615.0760  |
| 23.0000 * | 2.3000   | 2.3355  | -3.545e-02 | 611.2165 | 1999.2260 |
| 24.0000 * | 2.1000   | 2.0697  | +3.029e-02 | 613.4165 | 2050.8760 |

+: Back extrapolated concentration  
\*: Used for the calculation of Lambda z.

Calculated Values

|         |                                         |                   |
|---------|-----------------------------------------|-------------------|
| CMAX    | Max Conc                                | 163.2000 nmol/L   |
| TMAX    | Time of CMAX                            | 1.0000 h          |
| TLAG    | Time Until First Nonzero Conc           | 0.0000 h          |
| CLST    | Last Nonzero Conc                       | 2.1000 nmol/L     |
| CLSTP   | Last Nonzero Conc Pred                  | 2.0697 nmol/L     |
| TLST    | Time of Last Nonzero Conc               | 24.0000 h         |
| LAMZHL  | Half-Life Lambda z                      | 5.7380 h          |
| LAMZ    | Lambda z                                | 0.1208 /h         |
| LAMZLL  | Lambda z Lower Limit                    | 4.0000 h          |
| LAMZUL  | Lambda z Upper Limit                    | 24.0000 h         |
| LAMZNPT | Number of Points for Lambda z           | 3                 |
| CORRXY  | Correlation Between TimeX and Log ConcY | -0.9999           |
| R2      | R Squared                               | 0.9999            |
| R2ADJ   | R Squared Adjusted                      | 0.9998            |
| AUCLST  | AUC to Last Nonzero Conc                | 613.4165 h*nmol/L |
| AUCALL  | AUC All                                 | 613.4165 h*nmol/L |
| AUCIFO  | AUC Infinity Obs                        | 630.8007 h*nmol/L |
| AUCIFP  | AUC Infinity Pred                       | 630.5500 h*nmol/L |
| AUCPEO  | AUC %Extrapolation Obs                  | 2.7559 %          |

subj=3

|          |                                    |                     |
|----------|------------------------------------|---------------------|
| AUCPEP   | AUC %Extrapolation Pred            | 2.7172 %            |
| AUMCLST  | AUMC to Last Nonzero Conc          | 2050.8760 h2*nmol/L |
| AUMCIFO  | AUMC Infinity Obs                  | 2612.0081 h2*nmol/L |
| AUMCIFP  | AUMC Infinity Pred                 | 2603.9131 h2*nmol/L |
| AUMCPEO  | AUMC %Extrapolation Obs            | 21.4828 %           |
| AUMCPEP  | AUMC % Extrapolation Pred          | 21.2387 %           |
| VZFO     | Vz Obs by F                        | 0.0000 L            |
| VZFP     | Vz Pred by F                       | 0.0000 L            |
| CLFO     | Total CL Obs by F                  | 0.0000 L/h          |
| CLFP     | Total CL Pred by F                 | 0.0000 L/h          |
| MRTEVLST | MRT Extravasc to Last Nonzero Conc | 3.3434 h            |
| MRTEVIFO | MRT Extravasc Infinity Obs         | 4.1408 h            |
| MRTEVIFP | MRT Extravasc Infinity Pred        | 4.1296 h            |

subj=3

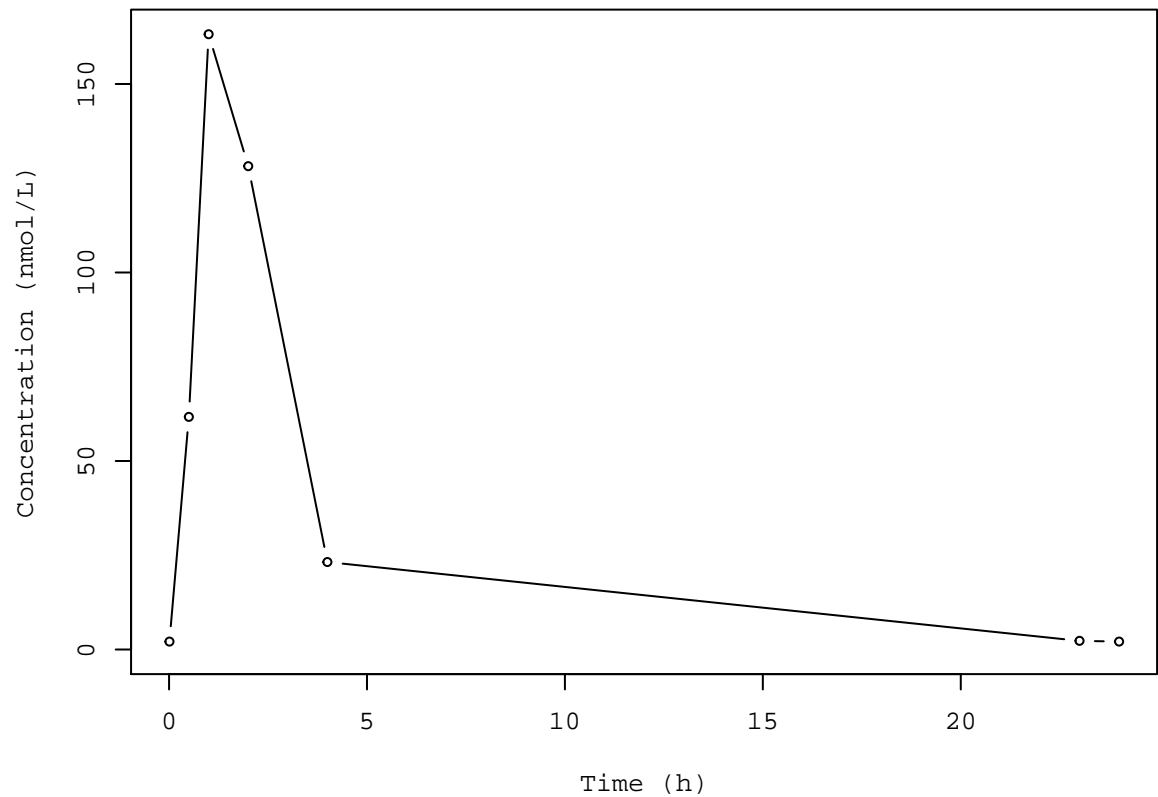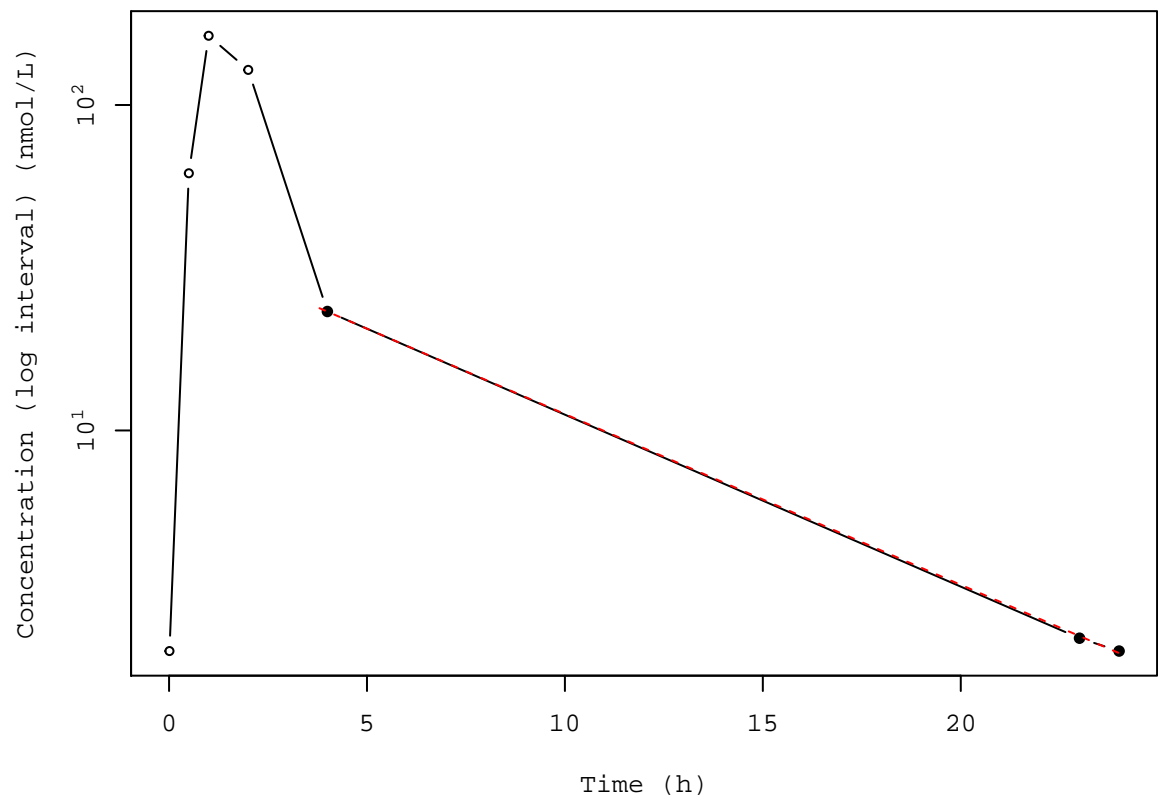

Individual Noncompartmental Analysis Result

subj=3

NONCOMPARTMENTAL ANALYSIS REPORT  
Package version 0.4.5 (2022-02-23)  
R version 4.0.5 (2021-03-31)

Date and Time: 2022-07-12 22:35:21 Europe/Prague

Calculation Setting

-----  
Drug Administration: Extravascular  
Observation count excluding trailing zero: 7  
Dose at time 0: 0 mmol  
AUC Calculation Method: Linear-up Linear-down  
Weighting for lambda z: Uniform (Ordinary Least Square, OLS)  
Lambda z selection criterion: Heighest adjusted R-squared value with precision=1e-4

Fitting, AUC, AUMC Result

| Time      | Conc.    | Pred.    | Residual   | AUC       | AUMC      |
|-----------|----------|----------|------------|-----------|-----------|
| 0.0000 +  | 0.0000   |          |            | 0.0000    | 0.0000    |
| 0.0100    | 10.0948  |          |            | 0.0505    | 0.0005    |
| 0.5000    | 50.4412  |          |            | 14.8818   | 6.2043    |
| 1.0000    | 195.0797 |          |            | 76.2620   | 61.2794   |
| 2.0000    | 216.6386 |          |            | 282.1212  | 375.4578  |
| 4.0000 *  | 113.1746 | 113.0219 | +1.527e-01 | 611.9343  | 1261.4332 |
| 23.0000 * | 10.8205  | 11.1166  | -2.961e-01 | 1789.8876 | 7926.3489 |
| 24.0000 * | 10.0948  | 9.8392   | +2.556e-01 | 1800.3453 | 8171.9228 |

+: Back extrapolated concentration  
\*: Used for the calculation of Lambda z.

Calculated Values

|         |                                         |                    |
|---------|-----------------------------------------|--------------------|
| CMAX    | Max Conc                                | 216.6386 nmol/L    |
| TMAX    | Time of CMAX                            | 2.0000 h           |
| TLAG    | Time Until First Nonzero Conc           | 0.0000 h           |
| CLST    | Last Nonzero Conc                       | 10.0948 nmol/L     |
| CLSTP   | Last Nonzero Conc Pred                  | 9.8392 nmol/L      |
| TLST    | Time of Last Nonzero Conc               | 24.0000 h          |
| LAMZHL  | Half-Life Lambda z                      | 5.6787 h           |
| LAMZ    | Lambda z                                | 0.1221 /h          |
| LAMZLL  | Lambda z Lower Limit                    | 4.0000 h           |
| LAMZUL  | Lambda z Upper Limit                    | 24.0000 h          |
| LAMZNPT | Number of Points for Lambda z           | 3                  |
| CORRXY  | Correlation Between TimeX and Log ConcY | -0.9998            |
| R2      | R Squared                               | 0.9996             |
| R2ADJ   | R Squared Adjusted                      | 0.9993             |
| AUCLST  | AUC to Last Nonzero Conc                | 1800.3453 h*nmol/L |
| AUCALL  | AUC All                                 | 1800.3453 h*nmol/L |
| AUCIFO  | AUC Infinity Obs                        | 1883.0491 h*nmol/L |
| AUCIFP  | AUC Infinity Pred                       | 1880.9550 h*nmol/L |
| AUCPEO  | AUC %Extrapolation Obs                  | 4.3920 %           |

subj=3

|          |                                    |                      |
|----------|------------------------------------|----------------------|
| AUCPEP   | AUC %Extrapolation Pred            | 4.2856 %             |
| AUMCLST  | AUMC to Last Nonzero Conc          | 8171.9228 h2*nmol/L  |
| AUMCIFO  | AUMC Infinity Obs                  | 10834.3795 h2*nmol/L |
| AUMCIFP  | AUMC Infinity Pred                 | 10766.9678 h2*nmol/L |
| AUMCPEO  | AUMC %Extrapolation Obs            | 24.5741 %            |
| AUMCPEP  | AUMC % Extrapolation Pred          | 24.1019 %            |
| VZFO     | Vz Obs by F                        | 0.0000 L             |
| VZFP     | Vz Pred by F                       | 0.0000 L             |
| CLFO     | Total CL Obs by F                  | 0.0000 L/h           |
| CLFP     | Total CL Pred by F                 | 0.0000 L/h           |
| MRTEVLST | MRT Extravasc to Last Nonzero Conc | 4.5391 h             |
| MRTEVIFO | MRT Extravasc Infinity Obs         | 5.7536 h             |
| MRTEVIFP | MRT Extravasc Infinity Pred        | 5.7242 h             |

subj=3

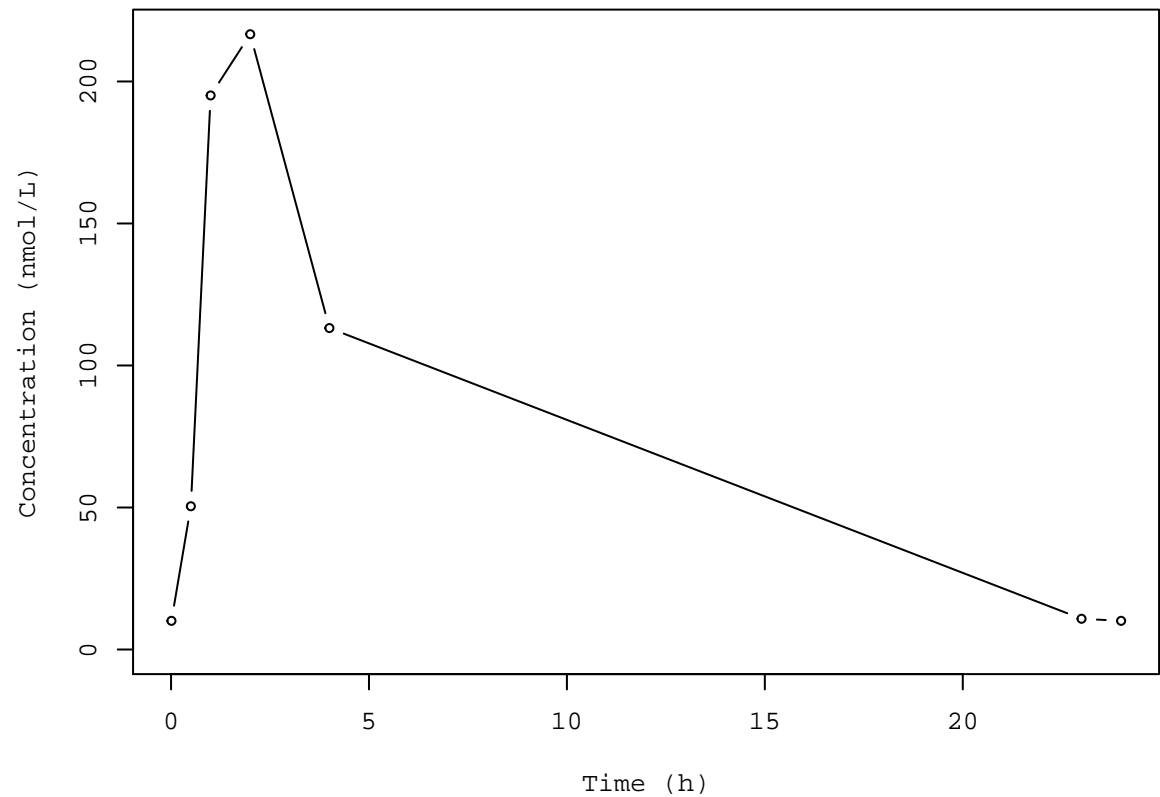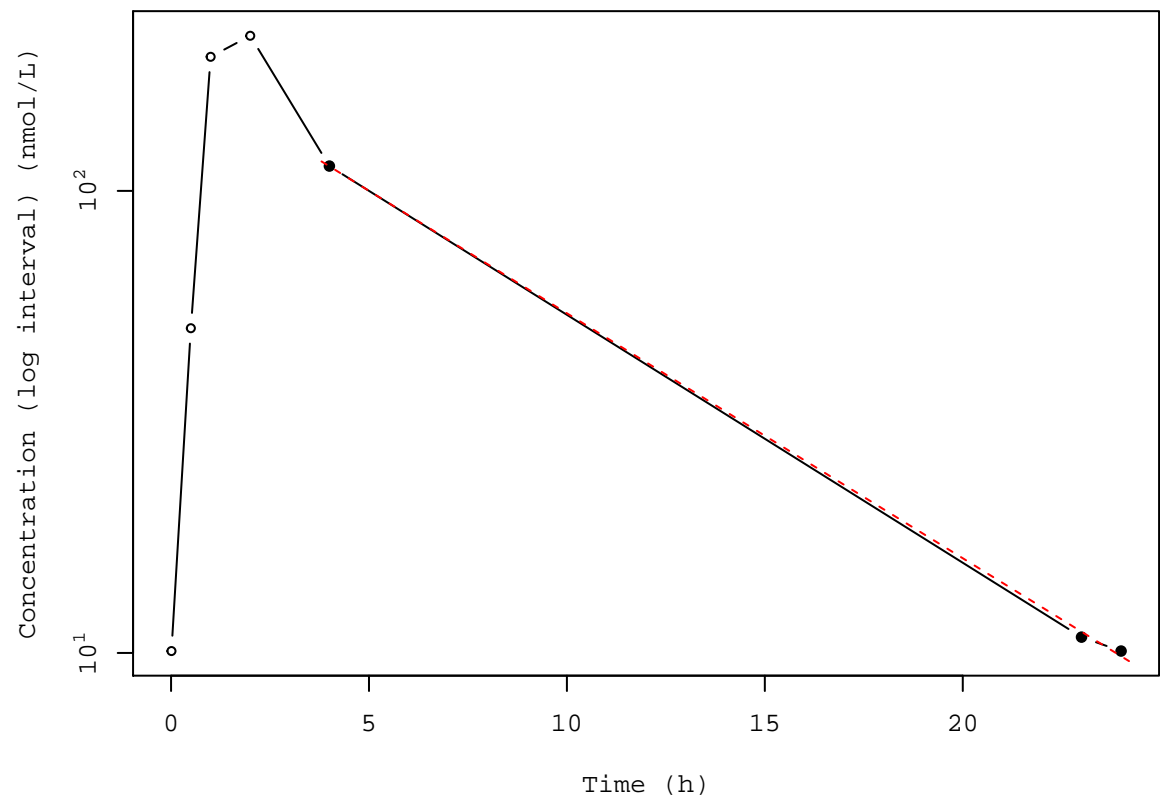



Individual Noncompartmental Analysis Result

subj=3

NONCOMPARTMENTAL ANALYSIS REPORT  
Package version 0.4.5 (2022-02-23)  
R version 4.0.5 (2021-03-31)

Date and Time: 2022-04-02 23:24:21 Europe/Prague

Calculation Setting

-----  
Drug Administration: Extravascular  
Observation count excluding trailing zero: 7  
Dose at time 0: 0.636 mmol  
AUC Calculation Method: Linear-up Linear-down  
Weighting for lambda z: Uniform (Ordinary Least Square, OLS)  
Lambda z selection criterion: Heighest adjusted R-squared value with precision=1e-4

Fitting, AUC, AUMC Result

| Time      | Conc.    | Pred.    | Residual   | AUC       | AUMC       |
|-----------|----------|----------|------------|-----------|------------|
| 0.0000 +  | 0.0000   |          |            | 0.0000    | 0.0000     |
| 0.0100    | 12.2197  |          |            | 0.0611    | 0.0006     |
| 0.5000    | 112.1059 |          |            | 30.5209   | 13.7635    |
| 1.0000    | 358.2700 |          |            | 148.1149  | 117.3443   |
| 2.0000    | 344.8633 |          |            | 499.6816  | 641.3426   |
| 4.0000 *  | 136.3376 | 136.1707 | +1.669e-01 | 980.8825  | 1876.4198  |
| 23.0000 * | 13.1573  | 13.4836  | -3.264e-01 | 2401.0840 | 9932.1096  |
| 24.0000 * | 12.2197  | 11.9385  | +2.812e-01 | 2413.7725 | 10230.0544 |

+: Back extrapolated concentration  
\*: Used for the calculation of Lambda z.

Calculated Values

|         |                                         |                         |
|---------|-----------------------------------------|-------------------------|
| CMAX    | Max Conc                                | 358.2700 nmol/L         |
| CMAXD   | Max Conc Norm by Dose                   | 563.3177 nmol/L/mmol    |
| TMAX    | Time of CMAX                            | 1.0000 h                |
| TLAG    | Time Until First Nonzero Conc           | 0.0000 h                |
| CLST    | Last Nonzero Conc                       | 12.2197 nmol/L          |
| CLSTP   | Last Nonzero Conc Pred                  | 11.9385 nmol/L          |
| TLST    | Time of Last Nonzero Conc               | 24.0000 h               |
| LAMZHL  | Half-Life Lambda z                      | 5.6952 h                |
| LAMZ    | Lambda z                                | 0.1217 /h               |
| LAMZLL  | Lambda z Lower Limit                    | 4.0000 h                |
| LAMZUL  | Lambda z Upper Limit                    | 24.0000 h               |
| LAMZNPT | Number of Points for Lambda z           | 3                       |
| CORRXY  | Correlation Between TimeX and Log ConcY | -0.9998                 |
| R2      | R Squared                               | 0.9997                  |
| R2ADJ   | R Squared Adjusted                      | 0.9994                  |
| AUCLST  | AUC to Last Nonzero Conc                | 2413.7725 h*nmol/L      |
| AUCALL  | AUC All                                 | 2413.7725 h*nmol/L      |
| AUCIFO  | AUC Infinity Obs                        | 2514.1751 h*nmol/L      |
| AUCIFOD | AUC Infinity Obs Norm by Dose           | 3953.1055 h*nmol/L/mmol |

subj=3

|          |                                    |                         |
|----------|------------------------------------|-------------------------|
| AUCIFP   | AUC Infinity Pred                  | 2511.8648 h*nmol/L      |
| AUCIFPD  | AUC Infinity Pred Norm by Dose     | 3949.4730 h*nmol/L/mmol |
| AUCPEO   | AUC %Extrapolation Obs             | 3.9935 %                |
| AUCPEP   | AUC %Extrapolation Pred            | 3.9052 %                |
| AUMCLST  | AUMC to Last Nonzero Conc          | 10230.0544 h2*nmol/L    |
| AUMCIFO  | AUMC Infinity Obs                  | 13464.6704 h2*nmol/L    |
| AUMCIFP  | AUMC Infinity Pred                 | 13390.2419 h2*nmol/L    |
| AUMCPEO  | AUMC %Extrapolation Obs            | 24.0230 %               |
| AUMCPEP  | AUMC % Extrapolation Pred          | 23.6007 %               |
| VZFO     | Vz Obs by F                        | 2078.4817 L             |
| VZFP     | Vz Pred by F                       | 2080.3933 L             |
| CLFO     | Total CL Obs by F                  | 252.9657 L/h            |
| CLFP     | Total CL Pred by F                 | 253.1983 L/h            |
| MRTEVLST | MRT Extravasc to Last Nonzero Conc | 4.2382 h                |
| MRTEVIFO | MRT Extravasc Infinity Obs         | 5.3555 h                |
| MRTEVIFP | MRT Extravasc Infinity Pred        | 5.3308 h                |

subj=3

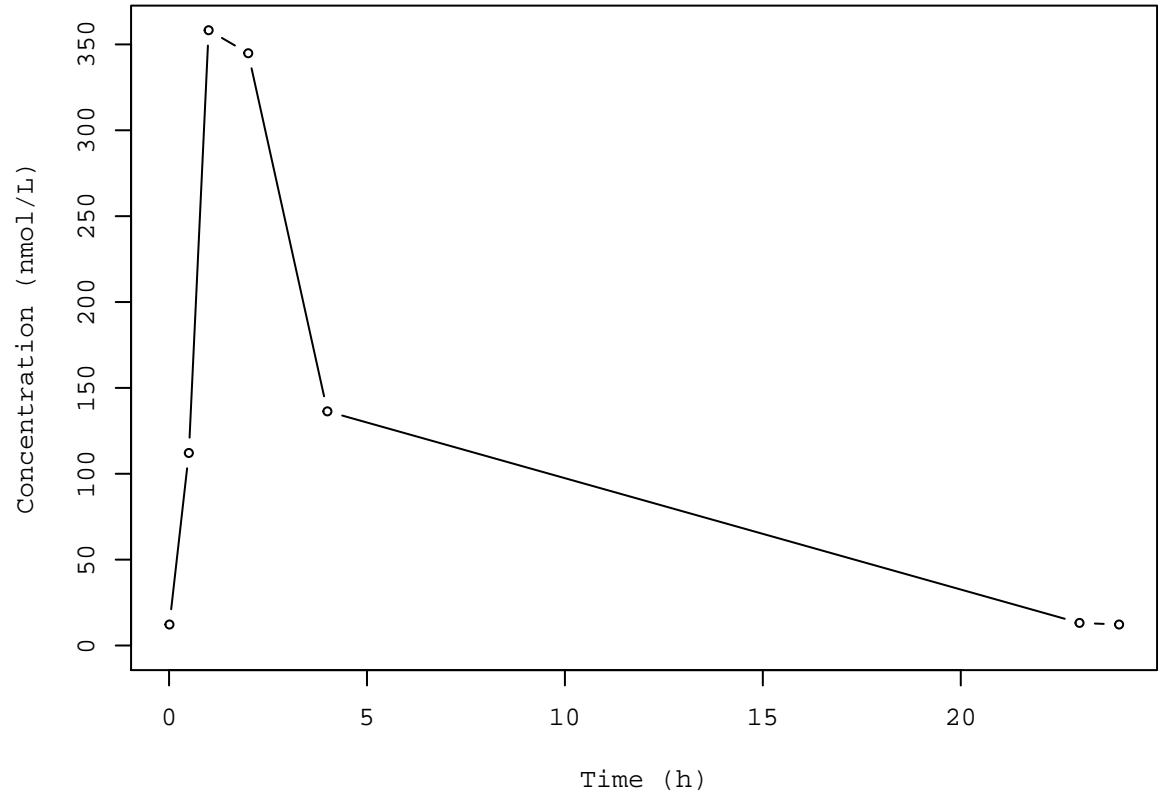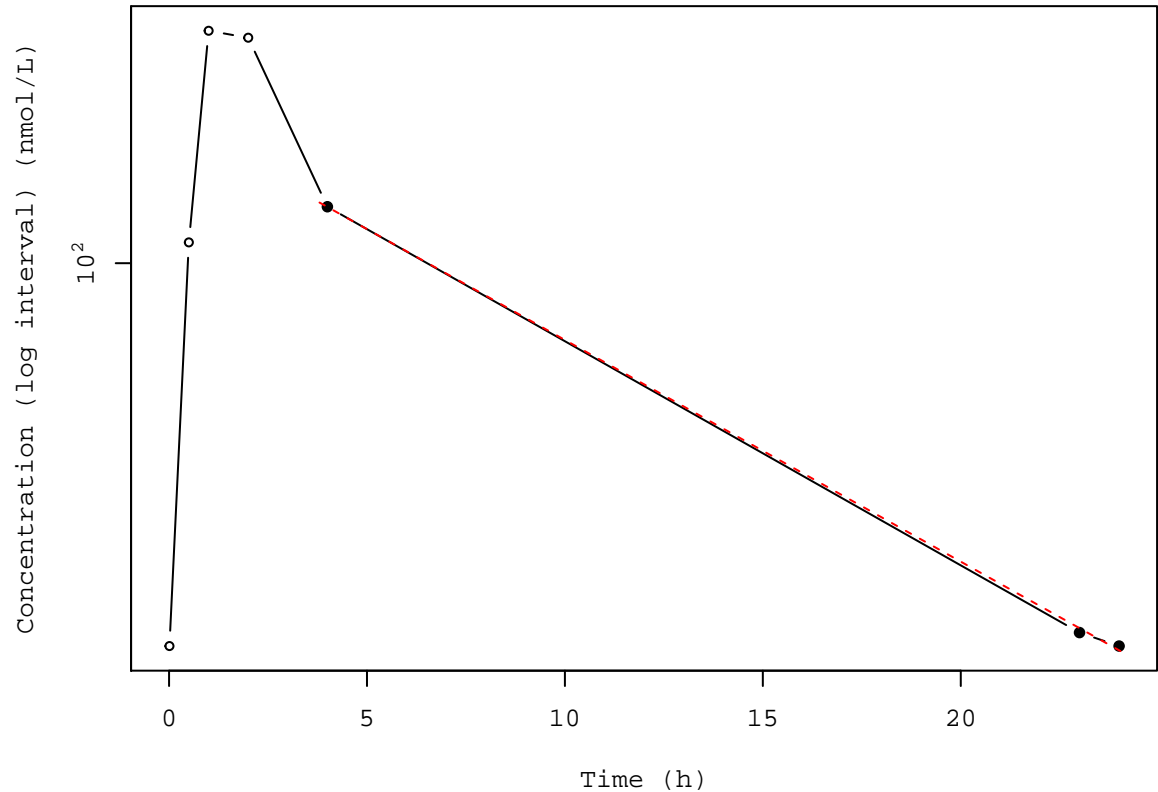

Supplement: s1 [file s1]
