# Supplementary material for: A High-Throughput Clinical Laboratory Methodology for the Therapeutic Monitoring of Ibrutinib and Dihydrodiol Ibrutinib
Source: MDPI journal article supplement (doi:10.3390/molecules27154766), 2022-07-25
Supplement: s1 [file s1]

**Supplementary File S1:** Multiple reaction monitoring optimization reports and the final detection settings employed for the high-throughput clinical analysis of ibrutinib and dihydrodiol ibrutinib. Note that the plus (+) signs in the “Optimality condition” sections refer to employing positive polarity. Under this setting, the instrument control software displays negative values for Q1 Pre-bias, CE and Q3 Pre-bias.

#### A. Optimization report of ibrutinib

Original Method File  
:C:\LabSolutions\Data\methods\optimization\clnnclzibr\_step3\_MRM-1.lcm

Tuning File :

<<Optimality condition>>

Adjust Precursor m/z :On  
Optimization for Q1 Pre-rod Bias :On  
Optimization for CE :On  
Optimization for Q3 Pre-rod Bias :On  
Adjust Product m/z :On  
Optimization for CE in detail :On

| ID | Acq Mode | +/- | Sample ID | Vial# | Tray | Inj Vol. |
|----|----------|-----|-----------|-------|------|----------|
| 6  | MRM      | +   | 3         | 1     | 0.5  |          |
| 7  | MRM      | +   | 3         | 1     | 0.5  |          |

<<Summary of Optimum Result>>

#6 OK  
#7 OK

<<Optimum result>>

ID6 Ch1  
441.40>304.00 -> 440.90>304.10  
Q1 Pre Bias -15.0 -> -10.0

CE -25.0 -> -31.0

Q3 Pre Bias -15.0 -> -15.0

ID7 Ch1

441.40>138.00 -> 440.90>138.10

Q1 Pre Bias -15.0 -> -10.0

CE -25.0 -> -28.0

Q3 Pre Bias -15.0 -> -14.0

<<Intensity>>

| #6:(ibrutinib-304) |          | Ch:1   | Precursor |
|--------------------|----------|--------|-----------|
| 440.90             | 10074288 | 100.0% | Selected  |
| 441.00             | 8845818  | 87.8%  |           |
| 441.10             | 6892959  | 68.4%  |           |
| 441.20             | 4655507  | 46.2%  |           |
| 441.30             | 1478205  | 14.7%  |           |
| 441.40             | 753431   | 7.5%   |           |
| 441.50             | 2152810  | 21.4%  |           |
| 441.60             | 2041495  | 20.3%  |           |
| 441.70             | 2170024  | 21.5%  |           |
| 441.80             | 2633368  | 26.1%  |           |
| 441.90             | 2907099  | 28.9%  |           |

| #6:(ibrutinib-304) |         | Ch:1   | CE       |
|--------------------|---------|--------|----------|
| -50.00             | 172040  | 14.5%  |          |
| -45.00             | 391853  | 33.0%  |          |
| -40.00             | 735188  | 62.0%  |          |
| -35.00             | 1065577 | 89.8%  |          |
| -30.00             | 1185993 | 100.0% | Selected |

|        |        |       |
|--------|--------|-------|
| -25.00 | 917267 | 77.3% |
| -20.00 | 408958 | 34.5% |
| -15.00 | 101741 | 8.6%  |
| -10.00 | 26750  | 2.3%  |

#6: (ibrutinib-304) Ch:1 CE\_Detail

|        |         |        |          |
|--------|---------|--------|----------|
| -35.00 | 1080546 | 88.2%  |          |
| -34.00 | 1118544 | 91.4%  |          |
| -33.00 | 1166421 | 95.3%  |          |
| -32.00 | 1199020 | 97.9%  |          |
| -31.00 | 1224438 | 100.0% | Selected |
| -30.00 | 1195843 | 97.7%  |          |
| -29.00 | 1178201 | 96.2%  |          |
| -28.00 | 1146448 | 93.6%  |          |
| -27.00 | 1122142 | 91.6%  |          |
| -26.00 | 1022714 | 83.5%  |          |
| -25.00 | 939981  | 76.8%  |          |

#6: (ibrutinib-304) Ch:1 Product

|        |         |        |          |
|--------|---------|--------|----------|
| 303.50 | 248066  | 20.6%  |          |
| 303.60 | 360106  | 30.0%  |          |
| 303.70 | 711172  | 59.2%  |          |
| 303.80 | 1013840 | 84.4%  |          |
| 303.90 | 1133140 | 94.3%  |          |
| 304.00 | 1191496 | 99.2%  |          |
| 304.10 | 1201696 | 100.0% | Selected |
| 304.20 | 1087138 | 90.5%  |          |
| 304.30 | 876628  | 72.9%  |          |
| 304.40 | 373695  | 31.1%  |          |

304.50      35354 2.9%

#6: (ibrutinib-304)      Ch:1   Q1PreBias

|        |         |        |          |
|--------|---------|--------|----------|
| -30.00 | 1197497 | 88.3%  |          |
| -29.00 | 1215264 | 89.6%  |          |
| -28.00 | 1247682 | 92.0%  |          |
| -27.00 | 1232652 | 90.9%  |          |
| -26.00 | 1165875 | 86.0%  |          |
| -25.00 | 1113461 | 82.1%  |          |
| -24.00 | 1077017 | 79.4%  |          |
| -23.00 | 1069989 | 78.9%  |          |
| -22.00 | 1117579 | 82.4%  |          |
| -21.00 | 1215368 | 89.6%  |          |
| -20.00 | 1261780 | 93.1%  |          |
| -19.00 | 1269784 | 93.7%  |          |
| -18.00 | 1206827 | 89.0%  |          |
| -17.00 | 1255946 | 92.6%  |          |
| -16.00 | 1337542 | 98.7%  |          |
| -15.00 | 1341513 | 99.0%  |          |
| -14.00 | 1210001 | 89.3%  |          |
| -13.00 | 1214209 | 89.6%  |          |
| -12.00 | 1338251 | 98.7%  |          |
| -11.00 | 1319949 | 97.4%  |          |
| -10.00 | 1355697 | 100.0% | Selected |

#6: (ibrutinib-304)      Ch:1   Q3PreBias

|        |         |       |
|--------|---------|-------|
| -30.00 | 1424839 | 90.2% |
| -29.00 | 1371043 | 86.8% |
| -28.00 | 1340724 | 84.8% |

|        |         |        |          |
|--------|---------|--------|----------|
| -27.00 | 1317466 | 83.4%  |          |
| -26.00 | 1305899 | 82.6%  |          |
| -25.00 | 1339712 | 84.8%  |          |
| -24.00 | 1378780 | 87.3%  |          |
| -23.00 | 1443065 | 91.3%  |          |
| -22.00 | 1494015 | 94.5%  |          |
| -21.00 | 1488250 | 94.2%  |          |
| -20.00 | 1400794 | 88.6%  |          |
| -19.00 | 1245006 | 78.8%  |          |
| -18.00 | 1145013 | 72.5%  |          |
| -17.00 | 1176401 | 74.4%  |          |
| -16.00 | 1438987 | 91.1%  |          |
| -15.00 | 1580227 | 100.0% | Selected |
| -14.00 | 1267684 | 80.2%  |          |
| -13.00 | 1138626 | 72.1%  |          |
| -12.00 | 1390226 | 88.0%  |          |
| -11.00 | 1233866 | 78.1%  |          |
| -10.00 | 1108890 | 70.2%  |          |

|                     |          |        |           |
|---------------------|----------|--------|-----------|
| #7: (ibrutinib-138) |          | Ch:1   | Precursor |
| 440.90              | 10232870 | 100.0% | Selected  |
| 441.00              | 8996696  | 87.9%  |           |
| 441.10              | 6964747  | 68.1%  |           |
| 441.20              | 4674962  | 45.7%  |           |
| 441.30              | 1505039  | 14.7%  |           |
| 441.40              | 794368   | 7.8%   |           |
| 441.50              | 2191437  | 21.4%  |           |
| 441.60              | 2119591  | 20.7%  |           |
| 441.70              | 2311052  | 22.6%  |           |
| 441.80              | 2727065  | 26.7%  |           |

|        |         |       |
|--------|---------|-------|
| 441.90 | 2970545 | 29.0% |
|--------|---------|-------|

|                     |      |    |
|---------------------|------|----|
| #7: (ibrutinib-138) | Ch:1 | CE |
|---------------------|------|----|

|        |         |        |          |
|--------|---------|--------|----------|
| -50.00 | 146395  | 9.6%   |          |
| -45.00 | 295647  | 19.3%  |          |
| -40.00 | 556324  | 36.4%  |          |
| -35.00 | 985323  | 64.4%  |          |
| -30.00 | 1505763 | 98.5%  |          |
| -25.00 | 1529157 | 100.0% | Selected |
| -20.00 | 808384  | 52.9%  |          |
| -15.00 | 191442  | 12.5%  |          |
| -10.00 | 37901   | 2.5%   |          |

|                     |      |           |
|---------------------|------|-----------|
| #7: (ibrutinib-138) | Ch:1 | CE_Detail |
|---------------------|------|-----------|

|        |         |        |          |
|--------|---------|--------|----------|
| -30.00 | 1517026 | 92.8%  |          |
| -29.00 | 1587566 | 97.1%  |          |
| -28.00 | 1635084 | 100.0% | Selected |
| -27.00 | 1633383 | 99.9%  |          |
| -26.00 | 1615600 | 98.8%  |          |
| -25.00 | 1545797 | 94.5%  |          |
| -24.00 | 1415419 | 86.6%  |          |
| -23.00 | 1279101 | 78.2%  |          |
| -22.00 | 1126365 | 68.9%  |          |
| -21.00 | 950323  | 58.1%  |          |
| -20.00 | 819711  | 50.1%  |          |

|                     |      |         |
|---------------------|------|---------|
| #7: (ibrutinib-138) | Ch:1 | Product |
|---------------------|------|---------|

|        |        |      |
|--------|--------|------|
| 137.50 | 146650 | 8.5% |
|--------|--------|------|

|        |         |        |          |
|--------|---------|--------|----------|
| 137.60 | 415550  | 24.0%  |          |
| 137.70 | 773060  | 44.7%  |          |
| 137.80 | 1178193 | 68.1%  |          |
| 137.90 | 1469164 | 84.9%  |          |
| 138.00 | 1637187 | 94.6%  |          |
| 138.10 | 1730439 | 100.0% | Selected |
| 138.20 | 1708889 | 98.8%  |          |
| 138.30 | 1671206 | 96.6%  |          |
| 138.40 | 1327024 | 76.7%  |          |
| 138.50 | 183531  | 10.6%  |          |

#7: (ibrutinib-138) Ch:1 Q1PreBias

|        |         |       |
|--------|---------|-------|
| -30.00 | 1572547 | 83.0% |
| -29.00 | 1666712 | 87.9% |
| -28.00 | 1659740 | 87.6% |
| -27.00 | 1660813 | 87.6% |
| -26.00 | 1586793 | 83.7% |
| -25.00 | 1531345 | 80.8% |
| -24.00 | 1478124 | 78.0% |
| -23.00 | 1474761 | 77.8% |
| -22.00 | 1550336 | 81.8% |
| -21.00 | 1641816 | 86.6% |
| -20.00 | 1724989 | 91.0% |
| -19.00 | 1723711 | 91.0% |
| -18.00 | 1703743 | 89.9% |
| -17.00 | 1725926 | 91.1% |
| -16.00 | 1874952 | 98.9% |
| -15.00 | 1859859 | 98.1% |
| -14.00 | 1623051 | 85.6% |
| -13.00 | 1659108 | 87.5% |

|        |         |        |          |
|--------|---------|--------|----------|
| -12.00 | 1864032 | 98.4%  |          |
| -11.00 | 1811609 | 95.6%  |          |
| -10.00 | 1895149 | 100.0% | Selected |

#7: (ibrutinib-138) Ch:1 Q3PreBias

|        |         |        |          |
|--------|---------|--------|----------|
| -30.00 | 2435547 | 92.5%  |          |
| -29.00 | 2467934 | 93.7%  |          |
| -28.00 | 2507671 | 95.2%  |          |
| -27.00 | 2504155 | 95.1%  |          |
| -26.00 | 2487594 | 94.4%  |          |
| -25.00 | 2491556 | 94.6%  |          |
| -24.00 | 2530565 | 96.1%  |          |
| -23.00 | 2492622 | 94.6%  |          |
| -22.00 | 2429631 | 92.2%  |          |
| -21.00 | 2382156 | 90.4%  |          |
| -20.00 | 2260953 | 85.8%  |          |
| -19.00 | 2178490 | 82.7%  |          |
| -18.00 | 2136194 | 81.1%  |          |
| -17.00 | 2209438 | 83.9%  |          |
| -16.00 | 2438053 | 92.6%  |          |
| -15.00 | 2615910 | 99.3%  |          |
| -14.00 | 2634198 | 100.0% | Selected |
| -13.00 | 2312334 | 87.8%  |          |
| -12.00 | 2019659 | 76.7%  |          |
| -11.00 | 2064760 | 78.4%  |          |
| -10.00 | 2511007 | 95.3%  |          |

## B. Dihydrodiol ibrutinib



Original Method File  
:C:\LabSolutions\Data\methods\optimization\dibr\_step3\_MRM-190625-  
1.lcm

Tuning File :

<<Optimality condition>>

Adjust Precursor m/z :On  
Optimization for Q1 Pre-rod Bias :On  
Optimization for CE :On  
Optimization for Q3 Pre-rod Bias :On  
Adjust Product m/z :On  
Optimization for CE in detail :On

| ID | Acq Mode | +/- | Sample ID | Vial# | Tray | Inj Vol. |
|----|----------|-----|-----------|-------|------|----------|
| 1  | MRM      | +   | 3         | 0     | 0.1  |          |
| 2  | MRM      | +   | 3         | 0     | 0.1  |          |

<<Summary of Optimum Result>>

#1 OK  
#2 OK

<<Optimum result>>

ID1 Ch1  
474.90>304.50 -> 474.70>304.10  
Q1 Pre Bias -11.0 -> -13.0  
CE -25.0 -> -32.0  
Q3 Pre Bias -15.0 -> -15.0

ID2 Ch1  
475.00>84.10 -> 474.70>84.10  
Q1 Pre Bias -11.0 -> -16.0  
CE -25.0 -> -39.0

Q3 Pre Bias -16.0 -> -15.0

<<Intensity>>

| #1: (dibr-305) | Ch:1    | Precursor |          |
|----------------|---------|-----------|----------|
| 474.40         | 921631  | 25.3%     |          |
| 474.50         | 2493502 | 68.6%     |          |
| 474.60         | 3381551 | 93.0%     |          |
| 474.70         | 3635650 | 100.0%    | Selected |
| 474.80         | 3561682 | 98.0%     |          |
| 474.90         | 3433977 | 94.5%     |          |
| 475.00         | 3289134 | 90.5%     |          |
| 475.10         | 2901561 | 79.8%     |          |
| 475.20         | 1832063 | 50.4%     |          |
| 475.30         | 940280  | 25.9%     |          |
| 475.40         | 557080  | 15.3%     |          |

| #1: (dibr-305) | Ch:1  | CE     |          |
|----------------|-------|--------|----------|
| -50.00         | 2878  | 28.3%  |          |
| -45.00         | 5212  | 51.3%  |          |
| -40.00         | 8635  | 84.9%  |          |
| -35.00         | 10169 | 100.0% | Selected |
| -30.00         | 8524  | 83.8%  |          |
| -25.00         | 5345  | 52.6%  |          |
| -20.00         | 2300  | 22.6%  |          |
| -15.00         | 622   | 6.1%   |          |
| -10.00         | 133   | 1.3%   |          |

#1: (dibr-305) Ch:1 CE\_Detail

|        |       |        |          |
|--------|-------|--------|----------|
| -40.00 | 8691  | 83.0%  |          |
| -39.00 | 7769  | 74.2%  |          |
| -38.00 | 8068  | 77.1%  |          |
| -37.00 | 9280  | 88.6%  |          |
| -36.00 | 9981  | 95.3%  |          |
| -35.00 | 9403  | 89.8%  |          |
| -34.00 | 10247 | 97.9%  |          |
| -33.00 | 10314 | 98.5%  |          |
| -32.00 | 10470 | 100.0% | Selected |
| -31.00 | 9202  | 87.9%  |          |
| -30.00 | 8702  | 83.1%  |          |

| #1: (dibr-305) | Ch:1   | Product |          |
|----------------|--------|---------|----------|
| 304.00         | 428862 | 97.7%   |          |
| 304.10         | 439028 | 100.0%  | Selected |
| 304.20         | 385751 | 87.9%   |          |
| 304.30         | 285760 | 65.1%   |          |
| 304.40         | 82524  | 18.8%   |          |
| 304.50         | 8846   | 2.0%    |          |
| 304.60         | 2344   | 0.5%    |          |
| 304.70         | 1822   | 0.4%    |          |
| 304.80         | 1811   | 0.4%    |          |
| 304.90         | 1967   | 0.4%    |          |
| 305.00         | 1656   | 0.4%    |          |

| #1: (dibr-305) | Ch:1   | Q1PreBias |
|----------------|--------|-----------|
| -30.00         | 426977 | 89.4%     |
| -29.00         | 427262 | 89.4%     |
| -28.00         | 429472 | 89.9%     |

|        |        |        |          |
|--------|--------|--------|----------|
| -27.00 | 402278 | 84.2%  |          |
| -26.00 | 392064 | 82.1%  |          |
| -25.00 | 408258 | 85.5%  |          |
| -24.00 | 407509 | 85.3%  |          |
| -23.00 | 428510 | 89.7%  |          |
| -22.00 | 450336 | 94.3%  |          |
| -21.00 | 451318 | 94.5%  |          |
| -20.00 | 438394 | 91.8%  |          |
| -19.00 | 430449 | 90.1%  |          |
| -18.00 | 429284 | 89.9%  |          |
| -17.00 | 465585 | 97.5%  |          |
| -16.00 | 471779 | 98.8%  |          |
| -15.00 | 438243 | 91.7%  |          |
| -14.00 | 425502 | 89.1%  |          |
| -13.00 | 477724 | 100.0% | Selected |
| -12.00 | 459941 | 96.3%  |          |
| -11.00 | 467570 | 97.9%  |          |
| -10.00 | 443489 | 92.8%  |          |

#1: (dibr-305)      Ch:1    Q3PreBias

|        |        |       |
|--------|--------|-------|
| -30.00 | 492009 | 86.7% |
| -29.00 | 465454 | 82.0% |
| -28.00 | 462210 | 81.4% |
| -27.00 | 443233 | 78.1% |
| -26.00 | 455765 | 80.3% |
| -25.00 | 466670 | 82.2% |
| -24.00 | 499156 | 87.9% |
| -23.00 | 504199 | 88.8% |
| -22.00 | 514099 | 90.5% |
| -21.00 | 516008 | 90.9% |

|        |        |        |          |
|--------|--------|--------|----------|
| -20.00 | 488002 | 85.9%  |          |
| -19.00 | 437555 | 77.1%  |          |
| -18.00 | 374029 | 65.9%  |          |
| -17.00 | 411145 | 72.4%  |          |
| -16.00 | 507687 | 89.4%  |          |
| -15.00 | 567790 | 100.0% | Selected |
| -14.00 | 433857 | 76.4%  |          |
| -13.00 | 379701 | 66.9%  |          |
| -12.00 | 484569 | 85.3%  |          |
| -11.00 | 430619 | 75.8%  |          |
| -10.00 | 374673 | 66.0%  |          |

| #2: (dibr-84) | Ch:1    | Precursor |          |
|---------------|---------|-----------|----------|
| 474.50        | 2568301 | 69.5%     |          |
| 474.60        | 3405801 | 92.1%     |          |
| 474.70        | 3697734 | 100.0%    | Selected |
| 474.80        | 3614518 | 97.7%     |          |
| 474.90        | 3521096 | 95.2%     |          |
| 475.00        | 3357427 | 90.8%     |          |
| 475.10        | 2903618 | 78.5%     |          |
| 475.20        | 1845298 | 49.9%     |          |
| 475.30        | 953242  | 25.8%     |          |
| 475.40        | 585441  | 15.8%     |          |
| 475.50        | 922194  | 24.9%     |          |

| #2: (dibr-84) | Ch:1   | CE     |          |
|---------------|--------|--------|----------|
| -50.00        | 208093 | 87.9%  |          |
| -45.00        | 228575 | 96.5%  |          |
| -40.00        | 236783 | 100.0% | Selected |

|        |        |       |
|--------|--------|-------|
| -35.00 | 221076 | 93.4% |
| -30.00 | 166670 | 70.4% |
| -25.00 | 72789  | 30.7% |
| -20.00 | 15439  | 6.5%  |
| -15.00 | 2100   | 0.9%  |
| -10.00 | 767    | 0.3%  |

#2: (dibr-84) Ch:1 CE\_Detail

|        |        |        |          |
|--------|--------|--------|----------|
| -45.00 | 234493 | 93.4%  |          |
| -44.00 | 241707 | 96.3%  |          |
| -43.00 | 235425 | 93.8%  |          |
| -42.00 | 245007 | 97.6%  |          |
| -41.00 | 243076 | 96.9%  |          |
| -40.00 | 240778 | 96.0%  |          |
| -39.00 | 250932 | 100.0% | Selected |
| -38.00 | 244796 | 97.6%  |          |
| -37.00 | 242423 | 96.6%  |          |
| -36.00 | 235541 | 93.9%  |          |
| -35.00 | 226768 | 90.4%  |          |

#2: (dibr-84) Ch:1 Product

|       |        |        |          |
|-------|--------|--------|----------|
| 83.60 | 16940  | 6.9%   |          |
| 83.70 | 49111  | 20.1%  |          |
| 83.80 | 109442 | 44.8%  |          |
| 83.90 | 197710 | 80.9%  |          |
| 84.00 | 234099 | 95.8%  |          |
| 84.10 | 244278 | 100.0% | Selected |
| 84.20 | 239828 | 98.2%  |          |
| 84.30 | 207285 | 84.9%  |          |

84.40 165528 67.8%

84.50 16018 6.6%

84.60 1867 0.8%

#2: (dibr-84) Ch:1 Q1PreBias

|        |        |        |          |
|--------|--------|--------|----------|
| -30.00 | 228283 | 89.2%  |          |
| -29.00 | 224803 | 87.8%  |          |
| -28.00 | 228577 | 89.3%  |          |
| -27.00 | 214490 | 83.8%  |          |
| -26.00 | 210854 | 82.3%  |          |
| -25.00 | 217147 | 84.8%  |          |
| -24.00 | 214218 | 83.7%  |          |
| -23.00 | 227779 | 89.0%  |          |
| -22.00 | 237628 | 92.8%  |          |
| -21.00 | 241805 | 94.4%  |          |
| -20.00 | 236874 | 92.5%  |          |
| -19.00 | 226490 | 88.5%  |          |
| -18.00 | 234394 | 91.5%  |          |
| -17.00 | 252729 | 98.7%  |          |
| -16.00 | 256047 | 100.0% | Selected |
| -15.00 | 233190 | 91.1%  |          |
| -14.00 | 225243 | 88.0%  |          |
| -13.00 | 249674 | 97.5%  |          |
| -12.00 | 235471 | 92.0%  |          |
| -11.00 | 250426 | 97.8%  |          |
| -10.00 | 240674 | 94.0%  |          |

#2: (dibr-84) Ch:1 Q3PreBias

-30.00 316131 96.2%

|        |        |        |          |
|--------|--------|--------|----------|
| -29.00 | 309424 | 94.2%  |          |
| -28.00 | 312235 | 95.0%  |          |
| -27.00 | 299214 | 91.0%  |          |
| -26.00 | 296870 | 90.3%  |          |
| -25.00 | 303577 | 92.4%  |          |
| -24.00 | 311619 | 94.8%  |          |
| -23.00 | 306156 | 93.2%  |          |
| -22.00 | 311216 | 94.7%  |          |
| -21.00 | 319342 | 97.2%  |          |
| -20.00 | 322657 | 98.2%  |          |
| -19.00 | 316444 | 96.3%  |          |
| -18.00 | 306395 | 93.2%  |          |
| -17.00 | 327892 | 99.8%  |          |
| -16.00 | 323192 | 98.3%  |          |
| -15.00 | 328646 | 100.0% | Selected |
| -14.00 | 300371 | 91.4%  |          |
| -13.00 | 258510 | 78.7%  |          |
| -12.00 | 225794 | 68.7%  |          |
| -11.00 | 237302 | 72.2%  |          |
| -10.00 | 304519 | 92.7%  |          |

C. General mass spectrometry settings:

| Parameter                    | Value set |
|------------------------------|-----------|
| Electrode potential          | 4000 V    |
| Interface temperature        | 300 °C    |
| Heat block temperature       | 400 °C    |
| Desolvation line temperature | 250 °C    |
| Nebulizing gas flow rate     | 3 L/min   |
| Drying gas flow rate         | 6 L/min   |
| Heating gas flow rate        | 12 L/min  |

Substance-specific mass spectrometry settings:



| Substance                                                   | Precursor ion | Product ion | Dwell time (ms) | Q1 bias (V) | Collision energy (V) | Q3 bias (V) |
|-------------------------------------------------------------|---------------|-------------|-----------------|-------------|----------------------|-------------|
| Ibrutinib (target)                                          | 440.9         | 304.1       | 40              | -10         | -31                  | -15         |
| Ibrutinib (qualifier)                                       | 440.9         | 138.1       | 40              | -10         | -28                  | -14         |
| Dihydrodiol ibrutinib (target)                              | 474.7         | 304.1       | 40              | -13         | -32                  | -15         |
| Dihydrodiol ibrutinib (qualifier)                           | 474.7         | 84.1        | 40              | -16         | -39                  | -15         |
| <sup>2</sup> H <sub>5</sub> -ibrutinib (target)             | 445.9         | 309.1       | 40              | -10         | -31                  | -15         |
| <sup>2</sup> H <sub>5</sub> -dihydrodiol ibrutinib (target) | 479.7         | 309.1       | 40              | -13         | -32                  | -15         |
