# Supplementary material for: A High-Throughput Clinical Laboratory Methodology for the Therapeutic Monitoring of Ibrutinib and Dihydrodiol Ibrutinib
Source: MDPI journal article supplement (doi:10.3390/molecules27154766), 2022-07-25
Supplement: s1 [file s1]

**Supplementary File S3: Scripts run in the R environment.**

**(A) Nonparametric and parametric regression algorithms for evaluating the relationship between concentrations of ibrutinib, dihydrodiol ibrutinib and the active moiety (ibrutinib+dihydrodiol ibrutinib), and the standard deviations obtained in parallel analyses**

```
# By running this script you will perform regression using
unweighted linear least squares, unweighted second degree polynomial
least squares, and Theil's regression with and without the Siegel
correction. Regression plots will be created.
```

```
# additionally required library
```

```
library(ggplot2)
```

```
# construction of input data tables
```

```
data=read.csv(file.choose()) # headers in the data file should be:
```

```
      # "conc", "sd"
```

```
data=data[1:21,]
```

```
sln=matrix(, nrow=nrow(data)-1, ncol=nrow(data)-1)
```

```
difn=matrix(, nrow=nrow(data)-1, ncol=nrow(data)-1)
```

```
ssln=matrix(, nrow=nrow(data), ncol=nrow(data))
```

```
sdifn=matrix(, nrow=nrow(data), ncol=nrow(data))
```

```
# Theil's regression without the Siegel estimator
```

```
for (i in 1:(nrow(data)-1)) {
```

```
  for (j in (i+1):nrow(data)) {
```

```
    sln[i,j-1]=(data$sd[j]-data$sd[i])/(data$conc[j]-data$conc[i])
```

```
    difn[i,j-1]=data$sd[j]-sln[i,j-1]*data$conc[j]
```

```
  }
```

```
}
```

```
thsl=median(as.numeric(sln)[!is.na(sln)])
```

```
thint=median(data$sd-thsl*data$conc)
```

```

# Theil's regression with the Siegel estimator
for (k in 1:nrow(data)) {
  for (l in 1:nrow(data)) {
    if (k==l) {
      ssln[k,l]=NA
      sdifn[k,l]=NA
    } else {
      ssln[k,l]=(data$sd[l]-data$sd[k])/(data$conc[l]-data$conc[k])
      sdifn[k,l]=(data$conc[l]*data$sd[k]-
data$conc[k]*data$sd[l])/(data$conc[l]-data$conc[k])
    }
  }
}

```

```

# slope
slist=split(ssln, row(ssln))
slist=lapply(slist, function(x) x[!is.na(x)])
ssl=lapply(slist,median)
siegs1=median(as.vector(unlist(ssl)))

```

```

# intercept
ilist=split(sdifn, row(sdifn))
ilist=lapply(ilist, function(x) x[!is.na(x)])
si=lapply(ilist,median)
siegi=median(as.vector(unlist(si)))

```

```

# calculating errors of estimates
nscal=data$conc*thsl+thint
scal=data$conc*siegs1+siegi
data=cbind(data,nscal)
data=cbind(data,scal)

```

```

# unweighted linear least squares

```

```

ols=lm(data$sd~data$conc)
olscalcalc=data$conc*ols$coefficients[[2]]+ols$coefficients[[1]]
data=cbind(data,olscalcalc)

# unweighted second degree polynomial least squares
poly2=lm(sd ~ poly(conc, 2, raw = TRUE), data = data)
poly2calc=poly2$coefficients[[1]]+data$conc*poly2$coefficients[[2]]+
(data$conc^2)*poly2$coefficients[[3]]
data=cbind(data,poly2calc)

# calculation of nssr values
ns_nssr=sum((data$nsscalcalc-data$sd)^2/data$nsscalcalc^2)
s_nssr=sum((data$scalcalc-data$sd)^2/data$scalcalc^2)
ols_nssr=sum((data$olscalcalc-data$sd)^2/data$olscalcalc^2)
poly2_nssr=sum((data$poly2calc-data$sd)^2/data$poly2calc^2)

nssr=c(ns_nssr,s_nssr,ols_nssr,poly2_nssr)
names(nssr)=c("Theil","Siegel","OLS","2nd-OLS")

# plotting
nosiegel=ggplot(data,aes(x=conc,y=sd))+geom_point(size=4)+geom_abline(
intercept=thint,slope=thsl, size=2) +
theme_bw() +
theme(axis.text = element_text(size = 20))

siegel=ggplot(data,aes(x=conc,y=sd))+geom_point(size=4)+geom_abline(
intercept=siegi,slope=siegs1, size=2) +
theme_bw() +
theme(axis.text = element_text(size = 20))

olsplot=ggplot(data,aes(x=conc,y=sd))+geom_point(size=4)+geom_abline(
intercept= ols$coefficients[[1]],slope= ols$coefficients[[2]],
size=2) +
theme_bw() +

```

```
theme(axis.text = element_text(size = 20))
```

```
# call 'nssr' to display the results of nssr calculations; call '
nosiegel' to display the regression plot obtained by applying
Theil's regression without the Siegel estimator, call 'siegel' to
display the regression plot obtained by applying Theil's regression
with the Siegel estimator, call 'olsplot' to display the unweighted
linear regression plot
```

## **(B) Noncompartmental pharmacokinetic analysis**

```
# additionally required libraries
```

```
library(NonCompart)
```

```
library(ncar)
```

```
# load dataset
```

```
ncadata=read.csv(file.choose())
```

```
# columns: Subject
#('subj'), Time ('time'),
# Concentrations ('ibr',
# 'dib' and 'ibrdib')
```

```
# define variables
```

```
drug="ibrdib"
```

```
# drug identifier
```

```
fileid=paste0("p",subnum,"-",drug,".pdf")
```

```
# output file name
```

```
dose.adm=0.636
```

```
# administered dose in
```

```
# units of mmol
```

```
form="Extravascular"
```

```
# route of administration
```

```
doseunit="mmol"
```

```
# unit of dose
```

```
timeunit="h"
```

```
# time unit
```

```
cunit="nmol/L"
```

```
# concentration unit
```

```
column=5
```

```
# number of column in
```

```
# 'ncadata' containing
```

```
# the concentrations of
```

```

# the respective drug
#(3: ibr, 4: dibr,
# 5: ibr+dibr)

auc=AUC(ncadata$time,ncadata[,column], down="Linear")

# Perform single-subject NCA and make report
pdfNCA(fileName=fileid,ncadata,key="subj",colTime="time",colConc=dru
g,dose=dose.adm,adm=form,dur=0,doseUnit=doseunit,timeUnit=timeunit,c
oncUnit=cunit,down="Linear",R2ADJ=0,MW=0,iAUC="",excludeDelta=0.3)
write.csv(auc,file=paste0("auc-p",subnum,"-",drug,".csv"))

```
